# Supplementary material for: TET2 deficiency reprograms the germinal center B cell epigenome and silences genes linked to lymphomagenesis
Source: PubMed Central journal article supplement — Sci Adv. 2020 Jun 17;6(25):eaay5872. doi: 10.1126/sciadv.aay5872 (PMC7299612; doi:10.1126/sciadv.aay5872), 2020-06-17
Supplement: aay5872_SM.pdf [file aay5872_SM.pdf]

## Supplementary Materials for

### **TET2 deficiency reprograms the germinal center B cell epigenome and silences genes linked to lymphomagenesis**

Wojciech Rosikiewicz, Xiaowen Chen, Pilar M. Dominguez, Hussein Ghamlouch, Said Aoufouchi, Olivier A. Bernard, Ari Melnick\*, Sheng Li\*

\*Corresponding author. Email: [amm2014@med.cornell.edu](mailto:amm2014@med.cornell.edu) (A.M.); [sheng.li@jax.org](mailto:sheng.li@jax.org) (S.L.)

Published 17 June 2020, *Sci. Adv.* **6**, eaay5872 (2020)  
DOI: [10.1126/sciadv.aay5872](https://doi.org/10.1126/sciadv.aay5872)

#### **This PDF file includes:**

Supplementary Methods  
Figs. S1 to S4  
Table S1 to S10  
References

## Supplementary Methods

### RNA-seq

RNA-seq libraries for the *Vav-Cre* mouse model were generated using the TruSeq-stranded-mRNA sample kit (Illumina) following the Illumina single-end library preparation protocol. Single-end sequencing (SE50) was performed on an Illumina HiSeq2500. RNA-seq data were aligned to mm10 using STAR (60) and annotated to RefSeq reference annotation using the Subread package (61). RNA-seq libraries from *Aicda*<sup>-/-</sup> and *Aicda*<sup>+/+</sup> mice were prepared using the TruSeq RNA sample kit and sequenced on a HiSeq2000 sequencer, followed by the same computational analysis as described above. Differentially expressed genes (DEGs) were identified using the following strategy: 1) Genes with low expression, i.e., small numbers of reads over the analyzed samples, were removed prior to the analysis, as suggested by Ignatiadis et al.; (62). We adopted a threshold of at least 20 reads per gene mapped in all samples for this step; 2) Differential gene expression was computed using DESeq2 (63) for all remaining genes; 3) Using an independent filtering approach (64), the Benjamini and Hochberg correction for multiple hypothesis testing was applied to all genes with a positive differential expression covariate (i.e., absolute fold-change > 1.2), and all genes with FDR score less than 0.05 were considered as differentially expressed. For the purpose of the GSEA analysis, normalized expression levels were subsequently exported as GCT files and postprocessed as described in the “GSEA” section below.

## **Microarray data analysis**

Raw expression microarray readings from samples with DLBCL were processed using the Limma R package (65), including extraction from CEL files and normalization with RMA function. More specifically, we considered 7 samples with frameshift or stop codon gain mutations in the TET2 gene as TET2-mutated DLBCL, and 60 samples without any mutation of TET2 or CREBBP as a control (TET2<sup>WT</sup>), as described previously (14). To calculate DEGs, microarray probe expression levels were transformed to log<sub>2</sub> values and condensed using *avereps*. DEGs were called using *lmFit* and *eBayes* functions. FDR values lower than or equal to 0.05 were considered as significant, considering recomputed FDR scores for DEGs with a minimum of 1.5 FC. For the purpose of the GSEA analysis, normalized expression levels were subsequently exported as GCT files and postprocessed as described in the “GSEA” section below.

DNA methylation levels in human DLBCL samples with TET2 mutations, and their corresponding controls, were studied based on the results of Asmar et al. (12). More specifically, we utilized a precomputed list of 578 microarray probes hypermethylated in TET2-mutant samples (12). These probes were identified from global methylation profiling of the 12 DLBCL human patients with TET2 mutations and 18 TET2 wild-type cases, which was performed on the Infinium Human Methylation 450 Assay.

## **Hydroxymethylated DNA immunoprecipitation sequencing (hMeDIP-Seq)**

Studies of 5hmC were conducted in *Vav-Cre/Tet2<sup>-/-</sup>* and *Vav-Cre/Tet2<sup>+/+</sup>* germinal center B-cells as described previously (14). More specifically, a total of 1.5 µg of gDNA was

sonicated with a Covaris S220. End repair, A-tailing, and ligation of the preannealed adapters were conducted before immunoprecipitation with the 5hmC antibody (1 µg/mL; Active Motif 39791). Ten percent of the volume was set aside as input before immunoprecipitation. To control the efficiency of the 5hmC pulldown, we used spike-ins (Diagenode AF-107-0040), and amplification of the libraries was performed using Kapa HiFi Hot Start Ready Mix (Kapa Biosystems, KK2601) for 12 cycles. Concentrations and quality of the final DNA libraries were measured by Qubit (Life Technologies) and an Agilent 2100 Bioanalyzer, respectively.

Sequencing of the libraries was performed in an Illumina HiSeq2500 multiplexing a single pulldown and a single input on each lane. Reads were trimmed using cutadapt 1.9.1 (66) and aligned by bowtie 2.0.5 (67). Unique reads were extracted using an in-house pipeline. MACS2 (68) peak caller “callpeak” function was used to detect broad peaks with the following parameters “–nomodel –extsize 200 -B –SPMR –broad –bw 200 –broad-cutoff 0.1”. Subsequently, “bdgdiff” (from MACS2) was used to detect differential regions between *Vav-Cre/Tet2<sup>-/-</sup>* and *Vav-Cre/Tet2<sup>+/+</sup>* samples. Differentially hydroxymethylated regions (DHMRs) were annotated for introns, exons, promoters, and enhancers (defined as intergenic or intronic H3K27ac peaks from the study with the accession number GSE79640, excluding promoters). Promoter regions were defined as regions 2 kb upstream or downstream of the TSS of a gene. Enhancer regions were defined based on the presence of H3K27ac peaks in at least two samples from *Tet2<sup>WT</sup>* and *Crebbp<sup>WT</sup>* germinal center B-cells in mice, as described previously (14).

## GSEA

All gene set enrichment analyses (GSEA), using GSEA software (69, 70), were conducted with settings based on a previously published leukemia study (71). The only exception was the change of the “permute” parameter to “gene\_set” for the analysis of *Vav-Cre* mice germinal center B-cells, which is a consequence of dealing with sample sizes smaller than or equal to 7. As input files, we used the normalized gene expression levels from RNA-seq (*Vav-Cre/Tet2<sup>-/-</sup>* (n=4) samples and *Vav-Cre/Tet2<sup>+/+</sup>* (n=3) mouse GC B-cells) or microarray expression data (*TET2<sup>MUT</sup>* (n=7) and *TET2<sup>WT</sup>* (n=60) human DLBCL). GSEA was conducted against a database of gene sets, based on the publications of the Melnick and Straudt laboratories (25, 72-74), enlarged by the collection of gene signatures related with antigen processing and presentation and MHC genes, downloaded from GSKB database (75). In addition to that, the *Vav-Cre* mouse model was also tested against a collection of gene sets that are target genes of 13 transcription factors important for B-cell biology. These gene sets were obtained using RcisTarget (76). Specifically, we selected gene-motif rankings, which provided the rankings of all the 22,285 genes for each of 24,453 motifs using 500bp up- and downstream of TSSs. The top 100 genes for each motif were considered as targets of all the transcription factors annotated to that motif. Because a transcription factor can be annotated to multiple motifs, different transcription factors have different numbers of targets depending on the number of motifs annotated to the transcription factor and overlap between the highly ranked genes for these motifs. All of these gene sets contain human gene IDs; therefore, in order to conduct the analysis, all genes in mice were converted to their orthologs in human based on cross-species annotation reference

orthology database, created at The Jackson Laboratory, downloaded ([http://www.informatics.jax.org/downloads/reports/HOM\\_MouseHumanSequence.rpt](http://www.informatics.jax.org/downloads/reports/HOM_MouseHumanSequence.rpt)) from Mouse Genome Database (MGD) (77).

In addition, enrichment of the above described gene sets was also tested using hypergeometric test for the following genes of interest:

- Figure 3A: 930 genes with hyper-DMCs in their promoters in *Tet2*<sup>-/-</sup> mouse GC B-cells (with Mm background)
- Figure 4E: 1,274 leading-edge genes of key transcription factor targets in mouse (with Mm background)
- Figure 6C, J: 3,111 genes related with aberrant *Aicda*<sup>-/-</sup> signature (with Mm background)
- Figure 6C, J: 1,949 genes with aberrant *Tet2*<sup>-/-</sup> signature (with Mm background)
- Figure 7B: 614 hyper-DMC genes in mouse (with Mm-Hs orthologs background)
- Figure 7B: 241 hyper-DMC genes in human (with Mm-Hs orthologs background)

Defining the number of successes in the sample as  $k$ , sample size as  $s$ , number of successes in the population as  $M$ , and population size as  $N$ , hypergeometric test was computed for all enriched gene sets. Enriched gene sets were defined as those in which the number of successes in the sample ( $k$ ) was higher than the expected number of successes in the sample, with the assumption of random distribution, defined as  $s * M/N$ .

Finally, p-values for the enrichment of each set were corrected for multiple testing using the Benjamini–Hochberg correction.

### **SHM analysis**

We amplified by PCR the genomic areas described previously as AID targets in the J<sub>H</sub>4 (chr12:113,427,959-113,428,543) (43) and S<sub>μ</sub> (chr12:113,425,655-113,426,278) (42) regions. The amplicons were pooled and cleaned up using the MinElute PCR Purification Kit (Qiagen). Sequencing libraries were constructed from the purified PCR product by using Illumina TruSeq DNA Sample Preparation Kit v2 (Illumina). Each sample was tagged with a unique index and sequenced on the Illumina MiSeq platform producing 2 × 300 bp paired-end reads. This experiment was conducted on GC B-cells (B220<sup>+</sup>Fas<sup>+</sup>GL7<sup>+</sup>) from three *Vav-cre/Tet2<sup>+/+</sup>* and two *Vav-cre/Tet2<sup>-/-</sup>* replicates. PE 2 × 300 MiSeq reads were aligned to the *Mus musculus* GRCm38/mm10 genome using BWA-Mem (78), followed by variants calling with LoFreq program (79). Then, using bcftools (80), called variants were additionally filtered, excluding all known single-nucleotide polymorphisms (European Variation Archive accession GCA\_000001635.6). Finally, in-house scripts were used to remove all variants with high variant allele frequency (>25%), and to narrow down the subsequent analysis to C-to-T (i.e., U) variants, located inside the WRC motif, which is a motif preferred by AID to deaminate cytosines to uracil (44). The per replicate allele frequency of the remaining variants was then used to compare pulled TET2 wild-type vs. TET2 deficient replicates.

As an orthogonal analysis, we have also used previously filtered reads for the analysis with the Immcantation pipeline (81, 82). More specifically, the

*AssemblePairs.py*, *FilterSeq.py*, *CollapseSeq.py*, and *SplitSeq.py* tools were used to construct clones of the J<sub>H4</sub> and S<sub>μ</sub> regions represented by at least two pairs of paired-end reads. Next, clone sequences were aligned to the reference *Mus musculus* GRCm38/mm10 genome using BWA-MEM, and in-house scripts were used to identify C-to-T mutations at the AID-preferred motif, excluding alleles with high allele frequency (>25%) and known nucleotide polymorphisms. C-to-T mutations were then used to calculate the percentage of clones with at least one mutation, as well as the per-clone C-to-T mutation frequency normalized to 1 kb, computed as the number of mutations, divided by the clone length and multiplied by 1,000.



## Supplementary Figures

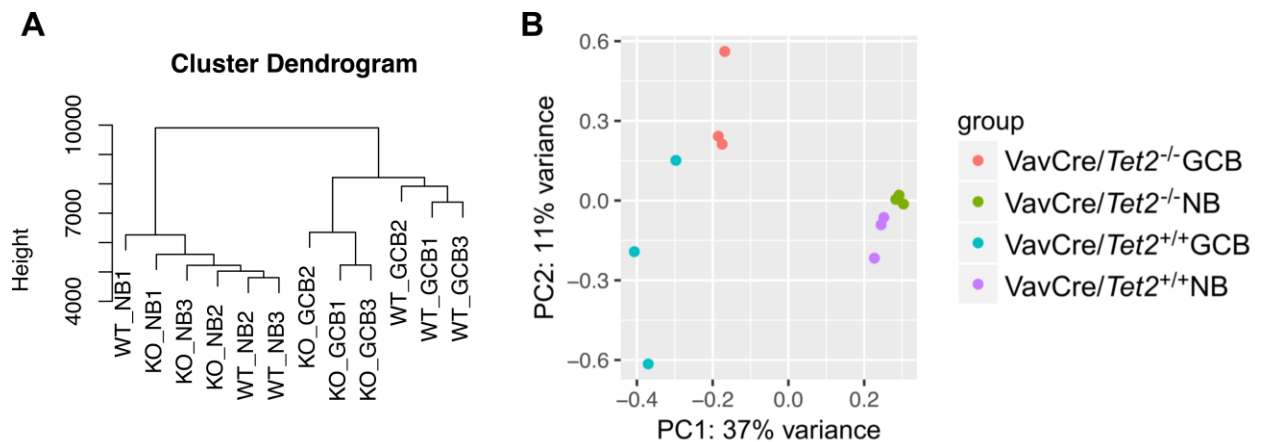

**Supplementary Figure 1. *Tet2* deficiency leads to hypermethylation in germinal center B-cells and loss of hypomethylation during the NB-to-GCB transition.** (A) Hierarchical clustering based on ERRBS data from three *Tet2*<sup>-/-</sup> and three *Tet2*<sup>+/+</sup> GCB samples as well as three *Tet2*<sup>-/-</sup> and three *Tet2*<sup>+/+</sup> naïve B-cell samples. NB – naïve B-cells, GCB – germinal center B-cells. (B) Principal component analysis based on ERRBS data from three *Tet2*<sup>-/-</sup> and three *Tet2*<sup>+/+</sup> GCB samples as well as three *Tet2*<sup>-/-</sup> and three *Tet2*<sup>+/+</sup> naïve B-cell samples.

**A** Gene set: 755 hyper-DMC genes  
Expression: *Tet2*<sup>-/-</sup> vs. *Tet2*<sup>+/+</sup> GC B-cells

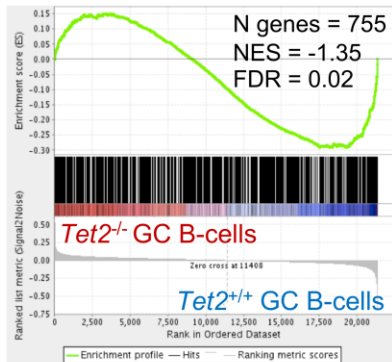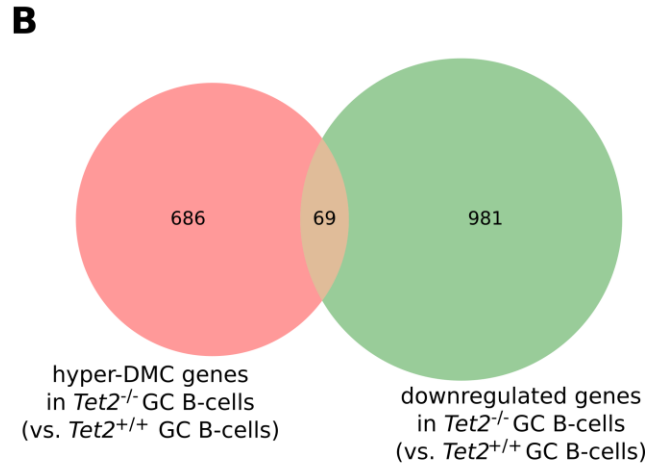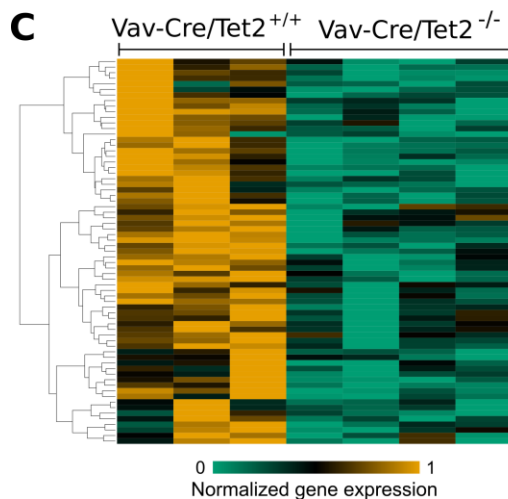

**Supplementary Figure 2. Genes with hypermethylated promoters is significantly overlapping with the down-regulated genes.** (A) Gene set enrichment analysis (GSEA) of 755 expressed genes with hyper-DMCs in promoters in *Tet2*-deficient germinal center (GC) B-cells. (B) Venn diagram of the overlap between genes with hyper-DMCs in their promoter regions and genes downregulated in TET2-deficient GC B-cells (in comparison with TET2 wild-type GC B-cells). (C). Heatmap of the expression of 69 downregulated genes with hyper-DMCs in their promoters.

**A**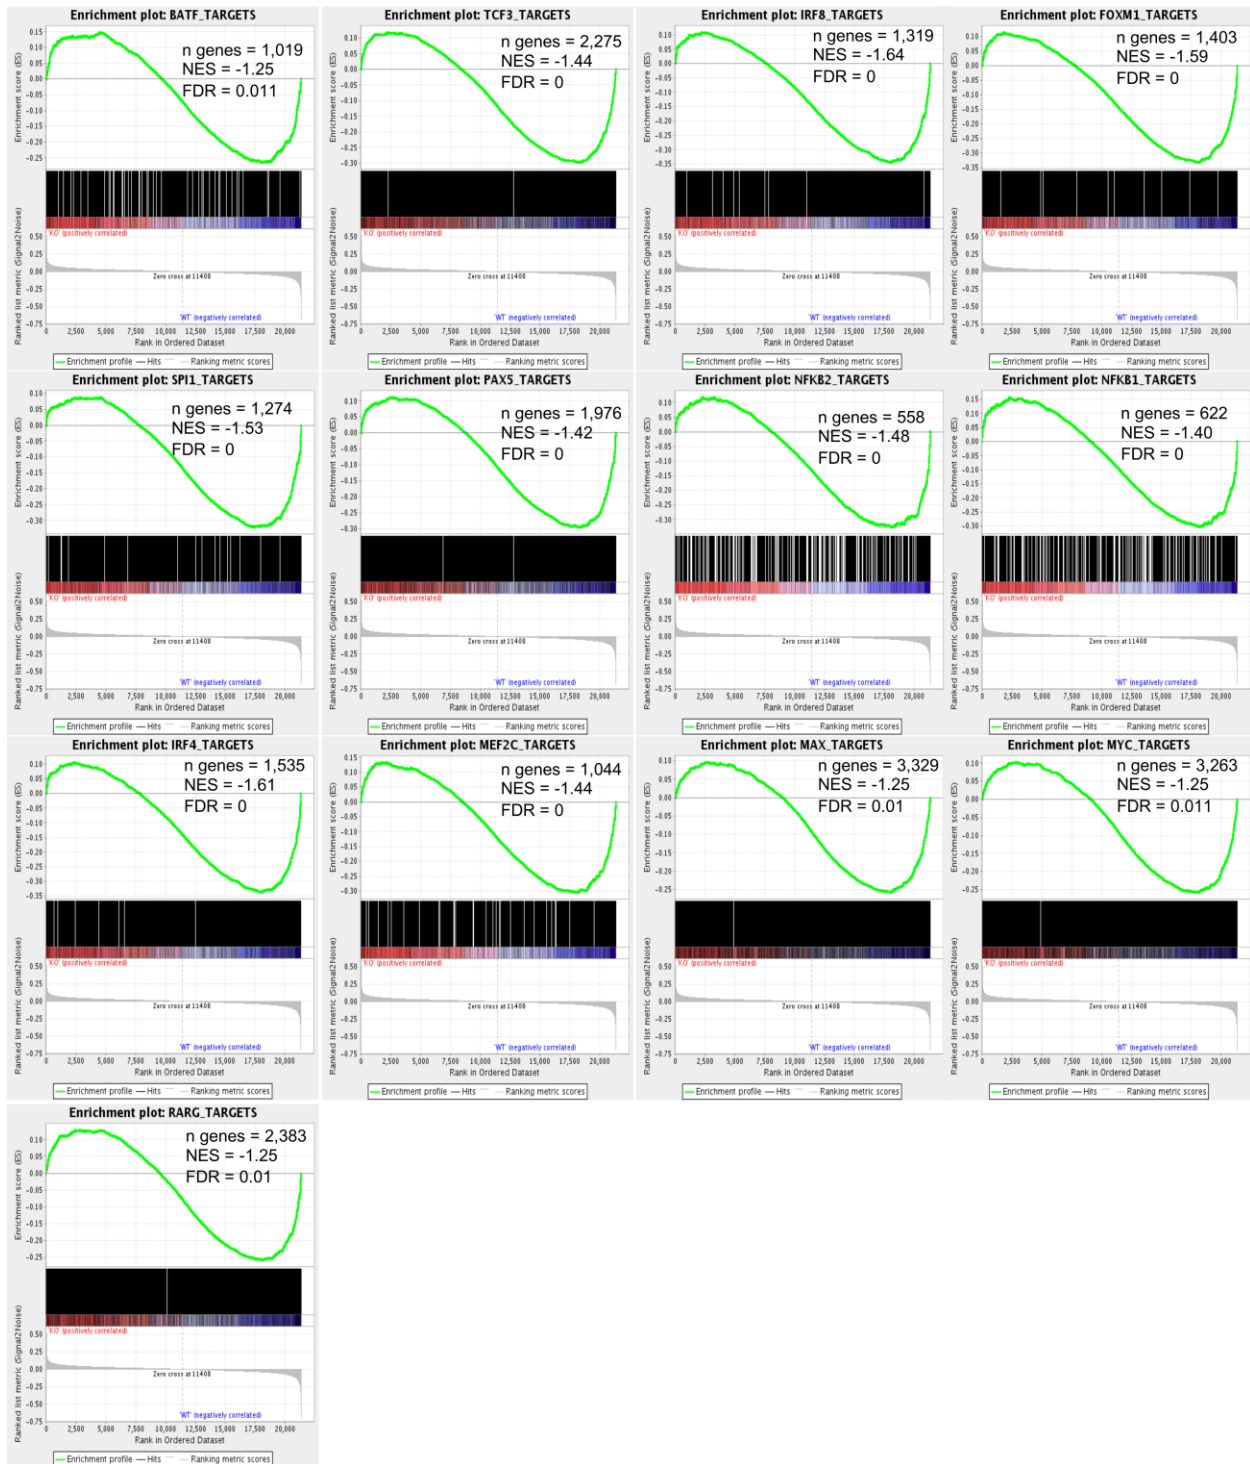

**Supplementary Figure 3. GSEA enrichment plots for target genes of 13 transcription factors with hypermethylated binding sites in *Tet2*-deficient germinal center B-cells.**

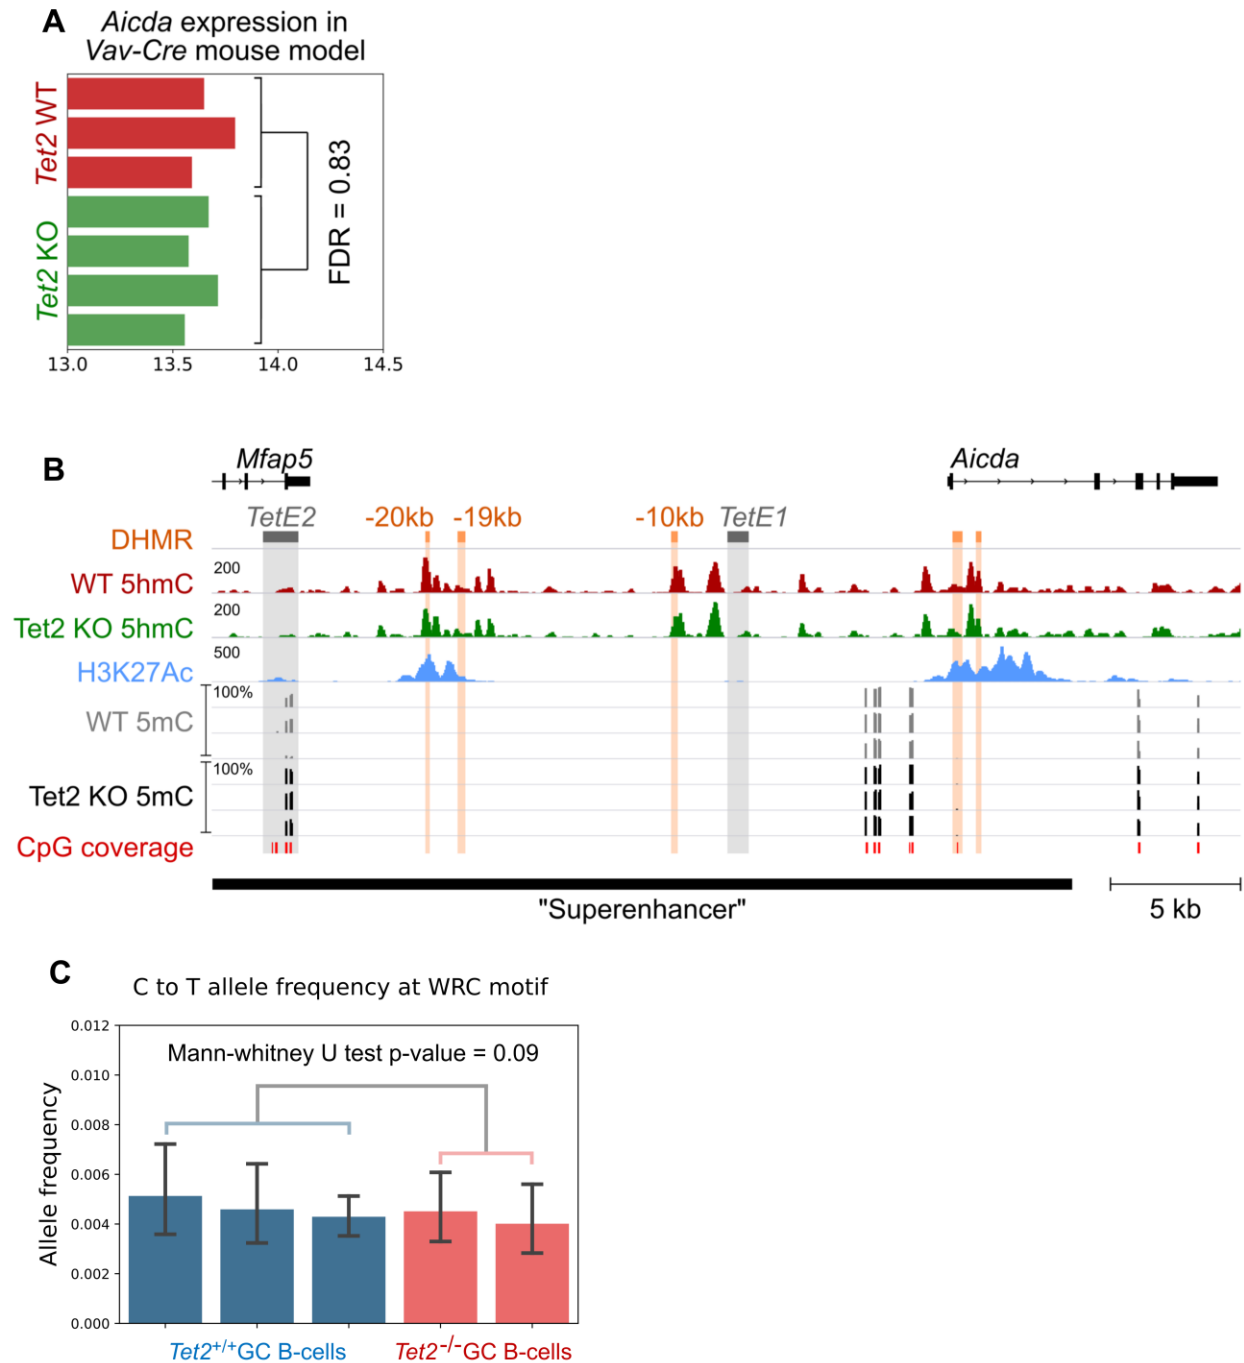

**Supplementary Figure 4. *Aicda* expression are not affected by *Tet2* deficiency.** (A) Normalized expression level of *Aicda* in GC B-cells, *Vav-Cre* mouse model. (B) Genome browser view of the *Aicda* locus (mm10; chr6:122,525,514-122,565,126). TetE1, TetE2 and superenhancer regions were annotated based on Lio et al. 2019. FDR – false discovery rate, *Tet2* KO – *Vav-Cre/Tet2<sup>-/-</sup>*, *Tet2* WT - *Vav-Cre/Tet2<sup>+/+</sup>*. (C) Allele frequency of C-to-T mutations at WRC motif, where W = A or T, and R = G or A.

## Supplementary Tables

**Supplementary Table 1. Number of differentially methylated cytosines (DMCs).**

| Comparison                                   | DMCs  | hyper-DMCs | hypo-DMCs |
|----------------------------------------------|-------|------------|-----------|
| Tet2 -/- GCBs <sup>1</sup> vs. Tet2 +/+ GCBs | 10730 | 9043       | 1687      |
| Tet2 -/- NBs <sup>2</sup> vs. Tet2 +/+ NBs   | 2091  | 1695       | 396       |
| Tet2 -/- GCBs vs. Tet2 -/- NBs               | 14009 | 1168       | 12841     |
| Tet2 +/+ GCBs vs. Tet2 +/+ NBs               | 22599 | 1449       | 21150     |

<sup>1</sup>GCBs - Germinal Center B-Cells

<sup>2</sup>NBs - Naïve B-Cells

**Supplementary Table 2. Genomic distribution of hyper-DMCs.**

| Genomic regions |            |      |        |          |      | Hyper-DMCs | All CpGs | Hyper-DMC sites per 100 CpGs covered by BS-seq |
|-----------------|------------|------|--------|----------|------|------------|----------|------------------------------------------------|
| Promoter        | Intergenic | Exon | Intron | Enhancer | DHMR |            |          |                                                |
| X               |            |      |        |          |      | 395        | 165474   | 0.2387                                         |
|                 | X          |      |        |          |      | 2360       | 251789   | 0.9373                                         |
|                 |            | X    |        |          |      | 732        | 94809    | 0.7721                                         |
|                 |            |      | X      |          |      | 2243       | 190377   | 1.1782                                         |
| X               |            |      |        |          | X    | 13         | 255      | 5.0980                                         |
|                 | X          |      |        |          | X    | 46         | 413      | 11.1380                                        |
|                 |            | X    |        |          | X    | 77         | 742      | 10.3774                                        |
|                 |            |      | X      |          | X    | 60         | 604      | 9.9338                                         |
|                 | X          |      |        | X        |      | 384        | 13660    | 2.8111                                         |
|                 |            | X    |        | X        |      | 163        | 2383     | 6.8401                                         |
|                 |            |      | X      | X        |      | 629        | 10242    | 6.1414                                         |
| X               |            |      | X      |          |      | 830        | 285289   | 0.2909                                         |
| X               |            | X    |        |          |      | 745        | 440327   | 0.1692                                         |
| X               |            |      | X      |          | X    | 63         | 562      | 11.2100                                        |
| X               |            | X    |        |          | X    | 80         | 804      | 9.9502                                         |
|                 | X          |      |        | X        | X    | 75         | 348      | 21.5517                                        |
|                 |            | X    |        | X        | X    | 38         | 265      | 14.3396                                        |
|                 |            |      | X      | X        | X    | 110        | 680      | 16.1765                                        |

**Supplementary Table 3. Leading edge hypermethylated and repressed genes.**

| GENE          | Rank in gene list | Rank metric score | Running enrichment score |
|---------------|-------------------|-------------------|--------------------------|
| TOX2          | 21353             | -0.584854662      | 9.74E-05                 |
| MCF2L         | 21347             | -0.463383079      | -0.01800285              |
| IGKV14-130    | 21346             | -0.441906333      | -0.032536075             |
| NPR2          | 21344             | -0.429306298      | -0.04634718              |
| TRP73         | 21293             | -0.268854588      | -0.057384577             |
| SMOC1         | 21291             | -0.267973185      | -0.065768205             |
| CACNG6        | 21289             | -0.263072014      | -0.07412419              |
| PLXND1        | 21265             | -0.228224173      | -0.08125855              |
| SNX18         | 21249             | -0.221290231      | -0.08768829              |
| H2-Q7         | 21235             | -0.212922469      | -0.09399765              |
| FAH           | 21223             | -0.206816643      | -0.100141644             |
| NACC2         | 21198             | -0.192208678      | -0.10546311              |
| MICU1         | 21185             | -0.184027463      | -0.11090891              |
| C030005K06RIK | 21173             | -0.175820142      | -0.11614667              |
| TMEM154       | 21166             | -0.173160121      | -0.12136972              |
| RAI2          | 21151             | -0.168731362      | -0.12612101              |
| GAS7          | 21146             | -0.166631445      | -0.13121882              |
| NDRG1         | 21128             | -0.159864157      | -0.13561974              |
| TLR6          | 21127             | -0.159760937      | -0.14063361              |
| NRXN2         | 21101             | -0.153602943      | -0.1444307               |
| DMPK          | 21072             | -0.147759452      | -0.14788905              |
| AI480526      | 21066             | -0.146057531      | -0.15228057              |
| VANGL1        | 21047             | -0.143082604      | -0.15598767              |
| PTMS          | 21033             | -0.141352698      | -0.15984417              |
| DPP4          | 20983             | -0.132433698      | -0.16189894              |
| CDKL4         | 20926             | -0.124176182      | -0.16333418              |
| GM16793       | 20871             | -0.117960617      | -0.16460752              |
| RAPGEFL1      | 20869             | -0.117644995      | -0.16825862              |
| ASS1          | 20846             | -0.116039224      | -0.17088044              |
| SLC11A1       | 20839             | -0.115383193      | -0.17422856              |
| DYRK4         | 20834             | -0.114946991      | -0.17765321              |
| ZBTB38        | 20832             | -0.11487025       | -0.18120977              |
| DNASE1L3      | 20831             | -0.114779428      | -0.18481249              |
| GATM          | 20817             | -0.113268547      | -0.18778132              |
| CHD5          | 20799             | -0.111776352      | -0.19050859              |
| MICAL3        | 20796             | -0.111441553      | -0.19391719              |
| ECHDC3        | 20760             | -0.107851408      | -0.19571342              |
| YPEL2         | 20734             | -0.104893431      | -0.19788246              |
| DGKH          | 20732             | -0.104715623      | -0.20112371              |
| SPAG8         | 20700             | -0.102270745      | -0.20290317              |
| HOPXOS        | 20686             | -0.101396918      | -0.20547968              |
| TUBG2         | 20663             | -0.09950643       | -0.2075919               |
| LHPP          | 20661             | -0.099422783      | -0.21066423              |
| ADAM19        | 20651             | -0.098428465      | -0.21334557              |
| BCAS1         | 20583             | -0.094522804      | -0.21318035              |
| ZFHX2         | 20582             | -0.094522722      | -0.21614489              |
| FCRLA         | 20555             | -0.09279713       | -0.21784736              |
| PSAP          | 20532             | -0.091631517      | -0.21968988              |
| RINL          | 20509             | -0.089960478      | -0.22149584              |

|          |       |              |             |
|----------|-------|--------------|-------------|
| ZBTB12   | 20504 | -0.089519717 | -0.22412314 |
| GM26698  | 20497 | -0.089249313 | -0.22663952 |
| GM13496  | 20465 | -0.087843858 | -0.2279339  |
| GM19705  | 20436 | -0.086374342 | -0.22932981 |
| GM4779   | 20421 | -0.085995786 | -0.23135921 |
| RHBDF1   | 20419 | -0.08589828  | -0.23400779 |
| FCGR4    | 20415 | -0.085815541 | -0.23655622 |
| NFKBIA   | 20402 | -0.085091271 | -0.23866518 |
| LDLRAP1  | 20399 | -0.084950656 | -0.24123684 |
| STOML1   | 20380 | -0.084137335 | -0.24302743 |
| GML      | 20377 | -0.084052563 | -0.24556917 |
| RARG     | 20365 | -0.083204009 | -0.24767138 |
| TNFAIP8  | 20353 | -0.082745247 | -0.24974698 |
| C5AR2    | 20337 | -0.082242332 | -0.25161403 |
| METTL21A | 20256 | -0.0797133   | -0.25031012 |
| CRB3     | 20225 | -0.078657478 | -0.25135395 |
| DTX1     | 20199 | -0.077538379 | -0.25260738 |
| P2RX4    | 20134 | -0.074861079 | -0.2519326  |
| VAMP1    | 20125 | -0.074530028 | -0.25389215 |
| HK1      | 20046 | -0.072275884 | -0.25244343 |
| MAP7D1   | 20035 | -0.071961254 | -0.25422484 |
| MIB2     | 20021 | -0.071293429 | -0.25585073 |
| MTUS1    | 19989 | -0.070260994 | -0.25658196 |
| TMEM8B   | 19981 | -0.070180945 | -0.25844577 |
| HINT2    | 19975 | -0.070114486 | -0.26040417 |
| KREMEN2  | 19918 | -0.068477824 | -0.2598849  |
| KCNJ10   | 19914 | -0.06837938  | -0.26188695 |
| FCAMR    | 19838 | -0.06645669  | -0.26039097 |
| RAP1GAP  | 19828 | -0.066033453 | -0.26203838 |
| AFMID    | 19817 | -0.065839089 | -0.263624   |
| MTSS1L   | 19814 | -0.065799899 | -0.26559186 |
| VIM      | 19797 | -0.065371089 | -0.2668789  |
| SFXN3    | 19782 | -0.064985052 | -0.26824957 |
| CPLX2    | 19762 | -0.0645997   | -0.26936543 |
| RUSC2    | 19758 | -0.064483464 | -0.27124587 |
| CDK5R1   | 19740 | -0.064209007 | -0.2724431  |
| LPO      | 19715 | -0.063493088 | -0.2732919  |
| PGF      | 19705 | -0.063168027 | -0.27484637 |
| PECAM1   | 19662 | -0.06226043  | -0.2747888  |
| CDHR5    | 19644 | -0.061873972 | -0.27591628 |
| SLC16A8  | 19640 | -0.061808653 | -0.27771124 |
| FAM169B  | 19595 | -0.060805101 | -0.27751395 |
| FAM184A  | 19552 | -0.059994489 | -0.27738225 |
| APITD1   | 19546 | -0.059825718 | -0.27902117 |
| MUC20    | 19523 | -0.059477776 | -0.2798296  |
| RAB26    | 19521 | -0.059455194 | -0.28164646 |
| CLEC4A1  | 19509 | -0.059324421 | -0.28297722 |
| PCDHGA12 | 19485 | -0.058898229 | -0.2837214  |
| WNT5B    | 19481 | -0.058841489 | -0.285423   |
| ST3GAL1  | 19476 | -0.058722496 | -0.2870743  |
| COX14    | 19440 | -0.057845701 | -0.28721708 |
| ZFP516   | 19402 | -0.057126872 | -0.2872353  |
| GM15232  | 19369 | -0.056602329 | -0.28747365 |
| TAPBP    | 19346 | -0.056126185 | -0.28818098 |



|               |       |              |             |
|---------------|-------|--------------|-------------|
| PGPEP1L       | 19322 | -0.055617798 | -0.28882483 |
| GM11841       | 19304 | -0.055311952 | -0.289744   |
| RP23-45G16.6  | 19194 | -0.053450566 | -0.28618777 |
| STON2         | 19115 | -0.052101858 | -0.2840779  |
| FUT1          | 19109 | -0.051937982 | -0.2854693  |
| GM8731        | 19010 | -0.05037383  | -0.28234118 |
| LBH           | 19003 | -0.050269704 | -0.28362983 |
| MIR6913       | 18926 | -0.049166895 | -0.28151733 |
| HOXA6         | 18878 | -0.04862234  | -0.2807779  |
| NFKBIB        | 18863 | -0.048332985 | -0.2816233  |
| SPON1         | 18836 | -0.047904238 | -0.2818771  |
| MAMSTR        | 18832 | -0.047789779 | -0.2832339  |
| TTLL1         | 18785 | -0.047169682 | -0.28249985 |
| OST4          | 18744 | -0.046585731 | -0.2820376  |
| 1110059E24RIK | 18730 | -0.046362579 | -0.28286764 |
| ACY1          | 18728 | -0.046325877 | -0.28427318 |
| ANXA2         | 18722 | -0.04626878  | -0.28548342 |
| STIM2         | 18712 | -0.046112936 | -0.28649768 |
| SPNS2         | 18589 | -0.044775456 | -0.28202188 |
| HERPUD1       | 18568 | -0.044529885 | -0.28245538 |
| HIC1          | 18476 | -0.043176979 | -0.2794347  |
| GATSL3        | 18464 | -0.043070816 | -0.28025493 |
| KATNAL1       | 18461 | -0.043031473 | -0.28150868 |
| GM10717       | 18429 | -0.042702787 | -0.28135353 |
| IKBKE         | 18421 | -0.042584281 | -0.28235304 |
| 4930578M01RIK | 18403 | -0.042362787 | -0.2828634  |
| IRF8          | 18402 | -0.042347107 | -0.28419206 |
| H2-KE6        | 18394 | -0.042245369 | -0.28518042 |
| MAST1         | 18391 | -0.042230926 | -0.28640828 |
| DNASE2A       | 18382 | -0.04213557  | -0.28734446 |
| IRAK2         | 18373 | -0.042067543 | -0.28827763 |
| SH2D3C        | 18359 | -0.041892257 | -0.28896597 |
| IFI30         | 18344 | -0.041740302 | -0.28960028 |
| FAM83G        | 18332 | -0.041608602 | -0.29037544 |
| LPHN1         | 18293 | -0.041027293 | -0.28983584 |
| PLA1A         | 18281 | -0.040897395 | -0.29058865 |
| ARAP1         | 18250 | -0.040598176 | -0.29041508 |
| CDC42SE1      | 18235 | -0.04045533  | -0.2910088  |

**Supplementary Table 4. Pathways enriched in genes with promoter hypermethylation in TET2-deficient GC B-cells.**

| Pathway                                                                                    | log2FC      | p-value     | FDR         |
|--------------------------------------------------------------------------------------------|-------------|-------------|-------------|
| c3.Crebbp.down 500                                                                         | 1.768418205 | 4.73E-08    | 1.24E-05    |
| CTCF NB all                                                                                | 0.270910987 | 2.18E-06    | 0.000189461 |
| P300 ly1 enhancer                                                                          | 0.847696041 | 2.12E-06    | 0.000189461 |
| CTCF NB enhancer                                                                           | 0.299304033 | 5.58E-06    | 0.000291299 |
| CTCF CB all                                                                                | 0.248254259 | 5.26E-06    | 0.000291299 |
| Myc ChIP PET 2plus                                                                         | 0.454352228 | 2.23E-05    | 0.000972162 |
| PU.1 CB enhancer                                                                           | 0.331931125 | 3.00E-05    | 0.001120399 |
| CTCF CB enhancer                                                                           | 0.255758339 | 4.11E-05    | 0.001340258 |
| PU.1 NB enhancer                                                                           | 0.302307089 | 4.71E-05    | 0.001366217 |
| PU.1 CB all                                                                                | 0.275676649 | 6.46E-05    | 0.00168653  |
| Pan B U133plus                                                                             | 2.106113616 | 9.02E-05    | 0.002139363 |
| GCB bivalentProm genes                                                                     | 0.530293254 | 0.000144261 | 0.002940357 |
| Ly1 BCL6RD2mut upreg                                                                       | 0.600700442 | 0.000146455 | 0.002940357 |
| Blimp Bcell repressed                                                                      | 2.269612348 | 0.000200439 | 0.003736762 |
| CTCF ly1 all                                                                               | 0.151113601 | 0.000289409 | 0.005035724 |
| denovobivGenes                                                                             | 0.697409078 | 0.000393515 | 0.006419206 |
| Resting blood B cell GNF                                                                   | 1.954110522 | 0.000458432 | 0.0064858   |
| BACH2 target ChIPseq                                                                       | 0.330058684 | 0.000445472 | 0.0064858   |
| LZvsDZ Teater CC Up vs CB                                                                  | 0.989504429 | 0.000472146 | 0.0064858   |
| B cell down anergy                                                                         | 3.854574849 | 0.000667956 | 0.008716828 |
| PU.1 NB all                                                                                | 0.214763871 | 0.000760488 | 0.00882042  |
| P300 ly1 all                                                                               | 0.214763871 | 0.000760488 | 0.00882042  |
| mouse.shCrebbp.r2.down p.500                                                               | 1.181256474 | 0.000780733 | 0.00882042  |
| mouse shCrebbp.r2.down 545                                                                 | 0.939463747 | 0.000811073 | 0.00882042  |
| mouse.shCrebbp.r2.0 p.1000 down                                                            | 0.906489618 | 0.000945635 | 0.009872429 |
| ly1.promoter.BCL6-SMRT.all.451                                                             | 0.870694514 | 0.001987191 | 0.01861418  |
| ly1.enhancer.INTRONIC.BCL6-SMRT.DRE.807                                                    | 0.643427185 | 0.001967223 | 0.01861418  |
| CTCF ly1 enhancer                                                                          | 0.146706201 | 0.001996924 | 0.01861418  |
| c1.Crebbp.down 500                                                                         | 0.989504429 | 0.002288318 | 0.020594861 |
| KLF2 induced                                                                               | 1.392760579 | 0.003118313 | 0.02712932  |
| NB GCB Progression All Genes RPKM plus5                                                    | 0.877294925 | 0.003235286 | 0.027233106 |
| KEGG ANTIGEN PROCESSING AND PRESENTATION                                                   | 1.813932864 | 0.003443266 | 0.027233106 |
| GO BP MM ANTIGEN PROCESSING AND PRESENTATION OF EXOGENOUS PEPTIDE ANTIGEN VIA MHC CLASS II | 3.176502944 | 0.003405307 | 0.027233106 |
| CD40 upregulated Burkitt lymphoma                                                          | 1.494678904 | 0.004510702 | 0.033769875 |
| Leucine starve up                                                                          | 1.323051607 | 0.004528527 | 0.033769875 |
| Glutamine Glucose starve both down                                                         | 0.776572337 | 0.004846681 | 0.035138441 |

|                                                 |             |             |             |
|-------------------------------------------------|-------------|-------------|-------------|
| HSC e-ERY down Ebert cell 11                    | 0.684649847 | 0.005944982 | 0.041936221 |
| Bcell down Ebert cell 11                        | 0.891100725 | 0.006135627 | 0.042142067 |
| Germinal center Bcell DLBCL                     | 1.818950939 | 0.006510986 | 0.043573519 |
| CTCF Iy1 prom                                   | 0.220668882 | 0.006830508 | 0.044569062 |
| Myeloma TACI high bone marrow plasma cell gene  | 1.369148022 | 0.007973505 | 0.050758166 |
| c3.Crebbp.up 500                                | 1.143079942 | 0.008375526 | 0.052047908 |
| Iy1.enhancer.INTRONIC.DISTAL.BCL6-SMRT.DRE.1275 | 0.447222098 | 0.009372912 | 0.056722976 |
| CTCF CB prom                                    | 0.311814847 | 0.009779823 | 0.056722976 |
| GO CC MM MHC CLASS II PROTEIN COMPLEX           | 3.591540443 | 0.009751216 | 0.056722976 |
| MD901.loss.5.enhancer.g                         | 0.450015867 | 0.010746819 | 0.060976515 |
| ABC gt GCB LC                                   | 2.591540443 | 0.011815143 | 0.065611751 |
| KMT2D DOWN DEGS MOUSE                           | 0.506052544 | 0.013606336 | 0.073984454 |
| Resting dendritic cell GNF                      | 1.306138224 | 0.015411406 | 0.082089324 |
| NB GCB Progression All Genes RPKM minus2        | 0.413347826 | 0.016289689 | 0.082602139 |
| IKZF1 CB enhancer                               | 0.657967805 | 0.017090098 | 0.082602139 |
| CTCF NB prom                                    | 0.287759695 | 0.016802069 | 0.082602139 |
| c1.Crebbp.down 397                              | 0.778772025 | 0.016056195 | 0.082602139 |
| GO ANTIGEN PROCESSING AND PRESENTATION          | 0.923161934 | 0.016571147 | 0.082602139 |
| MD901.loss.25.enhancer.g                        | 0.262069586 | 0.017871231 | 0.084807115 |
| Myc ChIP PET Expr Down                          | 0.784185521 | 0.02121569  | 0.098880268 |

**Supplementary Table 5. Leading edge genes enriched for hyper-DMCs genes impacting key pathways in B-cell biology.**

| GENE SYMBOL | RANK IN GENE LIST | RANK METRIC SCORE | RUNNING ES  |
|-------------|-------------------|-------------------|-------------|
| TAPBP       | 19346             | -0.056126185      | -0.425361   |
| ZFP516      | 19402             | -0.057126872      | -0.42144212 |
| ST3GAL1     | 19476             | -0.058722496      | -0.41819063 |
| APITD1      | 19546             | -0.059825718      | -0.41462457 |
| CDK5R1      | 19740             | -0.064209007      | -0.4164097  |
| SFXN3       | 19782             | -0.064985052      | -0.41093418 |
| VIM         | 19797             | -0.065371089      | -0.40414062 |
| FCAMR       | 19838             | -0.06645669       | -0.39845008 |
| DTX1        | 20199             | -0.077538379      | -0.40659523 |
| CRB3        | 20225             | -0.078657478      | -0.39880568 |
| C5AR2       | 20337             | -0.082242332      | -0.3946653  |
| RARG        | 20365             | -0.083204009      | -0.3864517  |
| LDLRAP1     | 20399             | -0.084950656      | -0.37832204 |
| NFKBIA      | 20402             | -0.085091271      | -0.3687136  |
| PSAP        | 20532             | -0.091631517      | -0.3643519  |
| FCRLA       | 20555             | -0.09279713       | -0.35480848 |
| ZFH2        | 20582             | -0.094522722      | -0.345257   |
| BCAS1       | 20583             | -0.094522804      | -0.33447874 |
| ADAM19      | 20651             | -0.098428465      | -0.32641652 |
| LHPP        | 20661             | -0.099422783      | -0.31550416 |
| YPEL2       | 20734             | -0.104893431      | -0.3069407  |
| MICAL3      | 20796             | -0.111441553      | -0.2971115  |
| CHD5        | 20799             | -0.111776352      | -0.2844602  |
| DNASE1L3    | 20831             | -0.114779428      | -0.27283484 |
| DPP4        | 20983             | -0.132433698      | -0.26485863 |
| PTMS        | 21033             | -0.141352698      | -0.2510525  |
| NDRG1       | 21128             | -0.159864157      | -0.23725887 |
| NACC2       | 21198             | -0.192208678      | -0.21859741 |
| H2-Q7       | 21235             | -0.212922469      | -0.1960169  |
| SNX18       | 21249             | -0.221290231      | -0.17139693 |
| PLXND1      | 21265             | -0.228224173      | -0.14608069 |
| TRP73       | 21293             | -0.268854588      | -0.11669763 |
| MCF2L       | 21347             | -0.463383079      | -0.06635964 |
| TOX2        | 21353             | -0.584854662      | 9.45E-05    |

**Supplementary Table 6. Hyper-DMCs in TET2-deficient GC B-cells are significantly overrepresented with binding sites of transcription factors essential for B-cells development.**

| Motif Name                                                       | Consensus             | P-value  | q-value (Benjamini) | % of Target Sequences with Motif |
|------------------------------------------------------------------|-----------------------|----------|---------------------|----------------------------------|
| ZNF711(Zf)/SHSY5Y-ZNF711-ChIP-Seq(GSE20673)/Homer                | AGGCCTAG              | 1.00E-10 | 0                   | 35.94%                           |
| E2A(bHLH),near_PU.1/Bcell-PU.1-ChIP-Seq(GSE21512)/Homer          | NVCACCTGBN            | 1.00E-10 | 0                   | 28.41%                           |
| ZFX(Zf)/mES-Zfx-ChIP-Seq(GSE11431)/Homer                         | AGGCCTRG              | 1.00E-10 | 0                   | 25.21%                           |
| Elk4(ETS)/Hela-Elk4-ChIP-Seq(GSE31477)/Homer                     | NRYTTCCGGY            | 1.00E-08 | 0                   | 20.37%                           |
| HEB(bHLH)/mES-Heb-ChIP-Seq(GSE53233)/Homer                       | VCAGCTGBNN            | 1.00E-07 | 0                   | 34.81%                           |
| Ptf1a(bHLH)/Panc1-Ptf1a-ChIP-Seq(GSE47459)/Homer                 | ACAGCTGTTN            | 1.00E-07 | 0                   | 43.89%                           |
| Slug(Zf)/Mesoderm-Snai2-ChIP-Seq(GSE61475)/Homer                 | SNGCACCTGCHS          | 1.00E-06 | 0                   | 12.18%                           |
| NFkB-p50,p52(RHD)/Monocyte-p50-ChIP-Chip(Schreiber_et_al.)/Homer | GGGGGAATCCCC          | 1.00E-06 | 0                   | 3.06%                            |
| PU.1:IRF8(ETS:IRF)/pDC-Irf8-ChIP-Seq(GSE66899)/Homer             | GGAAGTGAAAST          | 1.00E-05 | 0.0005              | 3.76%                            |
| E2A(bHLH)/proBcell-E2A-ChIP-Seq(GSE21978)/Homer                  | DNRCAGCTGY            | 1.00E-04 | 0.0007              | 27.19%                           |
| Elk1(ETS)/Hela-Elk1-ChIP-Seq(GSE31477)/Homer                     | HACTTCCGGY            | 1.00E-04 | 0.0007              | 18.72%                           |
| EBF2(EBF)/BrownAdipose-EBF2-ChIP-Seq(GSE97114)/Homer             | NABTCCCWDGGGAVH       | 1.00E-04 | 0.0015              | 15.85%                           |
| Ascl1(bHLH)/NeuralTubes-Ascl1-ChIP-Seq(GSE55840)/Homer           | NNVVCAGCTGBN          | 1.00E-04 | 0.0028              | 27.66%                           |
| Mef2c(MADS)/GM12878-Mef2c-ChIP-Seq(GSE32465)/Homer               | DCYAAAAATAGM          | 1.00E-03 | 0.0045              | 3.81%                            |
| Max(bHLH)/K562-Max-ChIP-Seq(GSE31477)/Homer                      | RCCACGTGGYYN          | 1.00E-03 | 0.0048              | 10.25%                           |
| FOXA1(Forkhead)/MCF7-FOXA1-ChIP-Seq(GSE26831)/Homer              | WAAGTAAACA            | 1.00E-03 | 0.0066              | 8.65%                            |
| AP-1(bZIP)/ThioMac-PU.1-ChIP-Seq(GSE21512)/Homer                 | VTGACTCATC            | 1.00E-03 | 0.0066              | 8.75%                            |
| ZNF322(Zf)/HEK293-ZNF322.GFP-ChIP-Seq(GSE58341)/Homer            | GAGCCTGGTACTGWGCC TGR | 1.00E-03 | 0.0066              | 5.79%                            |
| IRF4(IRF)/GM12878-IRF4-ChIP-Seq(GSE32465)/Homer                  | ACTGAAACCA            | 1.00E-03 | 0.007               | 5.60%                            |
| Oct2(POU,Homeobox)/Bcell-Oct2-ChIP-Seq(GSE21512)/Homer           | ATATGCAAAT            | 1.00E-03 | 0.0071              | 2.96%                            |
| AP-2gamma(AP2)/MCF7-TFAP2C-ChIP-Seq(GSE21234)/Homer              | SCCTSAGGSCAW          | 1.00E-03 | 0.0091              | 20.56%                           |
| Tcf7(HMG)/GM12878-TCF7-ChIP-Seq(Encode)/Homer                    | CTTTGATGTGSB          | 1.00E-03 | 0.0091              | 4.23%                            |
| Tbet(T-box)/CD8-Tbet-ChIP-                                       | AGGTGTGAAM            | 1.00E-03 | 0.0091              | 13.08%                           |

|                                                             |                          |          |        |        |
|-------------------------------------------------------------|--------------------------|----------|--------|--------|
| Seq(GSE33802)/Homer                                         |                          |          |        |        |
| EBF1(EBF)/Near-E2A-ChIP-Seq(GSE21512)/Homer                 | GTCCCCWGGGGA             | 1.00E-03 | 0.0091 | 19.19% |
| Jun-AP1(bZIP)/K562-cJun-ChIP-Seq(GSE31477)/Homer            | GATGASTCATCN             | 1.00E-03 | 0.0091 | 3.48%  |
| ETV4(ETS)/HepG2-ETV4-ChIP-Seq(ENCODE)/Homer                 | ACCGGAAGTG               | 1.00E-03 | 0.012  | 26.76% |
| RARg(NR)/ES-RARg-ChIP-Seq(GSE30538)/Homer                   | AGGTCAAGGTCA             | 1.00E-02 | 0.0243 | 1.18%  |
| ETV1(ETS)/GIST48-ETV1-ChIP-Seq(GSE22441)/Homer              | AACCGGAAGT               | 1.00E-02 | 0.0266 | 28.79% |
| EBF(EBF)/proBcell-EBF-ChIP-Seq(GSE21978)/Homer              | DGTCCCYRGGGA             | 1.00E-02 | 0.0266 | 4.09%  |
| PAX5(Paired,Homeobox)/GM12878-PAX5-ChIP-Seq(GSE32465)/Homer | GCAGCCAAGCRTGACH         | 1.00E-02 | 0.0266 | 6.49%  |
| Mef2d(MADS)/Retina-Mef2d-ChIP-Seq(GSE61391)/Homer           | GCTATTTTTAGC             | 1.00E-02 | 0.0322 | 1.93%  |
| JunB(bZIP)/DendriticCells-Junb-ChIP-Seq(GSE36099)/Homer     | RATGASTCAT               | 1.00E-02 | 0.0327 | 6.30%  |
| Atf3(bZIP)/GBM-ATF3-ChIP-Seq(GSE33912)/Homer                | DATGASTCATHN             | 1.00E-02 | 0.0376 | 7.43%  |
| IRF3(IRF)/BMDM-Irf3-ChIP-Seq(GSE67343)/Homer                | AGTTTCAKTTTC             | 1.00E-02 | 0.0376 | 4.19%  |
| BATF(bZIP)/Th17-BATF-ChIP-Seq(GSE39756)/Homer               | DATGASTCAT               | 1.00E-02 | 0.0431 | 7.15%  |
| ZEB1(Zf)/PDAC-ZEB1-ChIP-Seq(GSE64557)/Homer                 | VCAGGTRDRY               | 1.00E-02 | 0.0448 | 30.95% |
| Fosl2(bZIP)/3T3L1-Fosl2-ChIP-Seq(GSE56872)/Homer            | NATGASTCABNN             | 1.00E-02 | 0.0448 | 4.28%  |
| ZBTB18(Zf)/HEK293-ZBTB18.GFP-ChIP-Seq(GSE58341)/Homer       | AACATCTGGA               | 1.00E-02 | 0.0454 | 7.76%  |
| n-Myc(bHLH)/mES-nMyc-ChIP-Seq(GSE11431)/Homer               | VRCCACGTGG               | 1.00E-02 | 0.0512 | 10.96% |
| ZEB2(Zf)/SNU398-ZEB2-ChIP-Seq(GSE103048)/Homer              | GNMCAGGTGTGC             | 1.00E-02 | 0.0512 | 18.44% |
| RUNX(Runt)/HPC7-Runx1-ChIP-Seq(GSE22178)/Homer              | SAAACCACAG               | 1.00E-02 | 0.0512 | 10.54% |
| p63(p53)/Keratinocyte-p63-ChIP-Seq(GSE17611)/Homer          | NNDRCATGYCYNRRCATG<br>YH | 1.00E-02 | 0.0512 | 5.32%  |
| Fra2(bZIP)/Striatum-Fra2-ChIP-Seq(GSE43429)/Homer           | GGATGACTCATC             | 1.00E-02 | 0.0512 | 5.60%  |
| FOXA1(Forkhead)/LNCAP-FOXA1-ChIP-Seq(GSE27824)/Homer        | WAAGTAAACA               | 1.00E-02 | 0.0566 | 10.16% |
| FOXM1(Forkhead)/MCF7-FOXM1-ChIP-Seq(GSE72977)/Homer         | TRTTTACTTW               | 1.00E-02 | 0.0609 | 8.89%  |
| c-Myc(bHLH)/mES-cMyc-ChIP-Seq(GSE11431)/Homer               | VVCCACGTGG               | 1.00E-02 | 0.0629 | 7.53%  |
| Oct4(POU,Homeobox)/mES-Oct4-ChIP-Seq(GSE11431)/Homer        | ATTTGCATAW               | 1.00E-02 | 0.0838 | 3.90%  |

**Supplementary Table 7. Pathways enriched by B-cell biology key TF targets with repressed gene expression.**

| Pathway                                           | log2FC | p-value   | FDR       |
|---------------------------------------------------|--------|-----------|-----------|
| CTCF ly1 all                                      | 0.7549 | 4.34E-151 | 1.54E-148 |
| CTCF ly1 enhancer                                 | 0.8333 | 8.31E-136 | 1.48E-133 |
| CTCF CB all                                       | 0.8722 | 1.60E-112 | 1.89E-110 |
| CTCF CB enhancer                                  | 0.9505 | 3.60E-101 | 3.20E-99  |
| CTCF NB all                                       | 0.8371 | 1.20E-92  | 8.50E-91  |
| CTCF NB enhancer                                  | 0.9266 | 4.18E-85  | 2.48E-83  |
| PU.1 NB enhancer                                  | 0.9279 | 9.69E-70  | 4.92E-68  |
| PU.1 NB all                                       | 0.8009 | 3.29E-69  | 1.30E-67  |
| P300 ly1 all                                      | 0.8009 | 3.29E-69  | 1.30E-67  |
| PU.1 CB enhancer                                  | 0.9659 | 4.77E-65  | 1.69E-63  |
| PU.1 CB all                                       | 0.8392 | 2.66E-64  | 8.57E-63  |
| GC termDiff Genes                                 | 1.4581 | 8.68E-41  | 2.57E-39  |
| GCB bivalentProm genes                            | 1.3182 | 2.76E-40  | 7.53E-39  |
| PU.1 target ChIPseq Ebert Cell 11                 | 0.9985 | 1.81E-38  | 4.58E-37  |
| Ly1 BCL6RD2mut upreg                              | 1.3234 | 1.46E-33  | 3.45E-32  |
| c1.Crebbp.down 397                                | 2.2103 | 7.82E-33  | 1.73E-31  |
| NB GCB Progression All Genes RPKM minus2.to.plus2 | 0.8197 | 8.51E-33  | 1.78E-31  |
| EZH2 target ChIP                                  | 1.2779 | 3.63E-28  | 7.15E-27  |
| Ly1 siBCL6 48h upreg                              | 1.3511 | 4.24E-28  | 7.92E-27  |
| mouse shCrebbp.r2.down 545                        | 1.8676 | 2.63E-26  | 4.66E-25  |
| CTCF ly1 prom                                     | 0.6655 | 1.05E-24  | 1.77E-23  |
| GMP up Ebert cell 11                              | 1.5453 | 1.31E-23  | 2.11E-22  |
| denovobivGenes                                    | 1.3953 | 5.06E-23  | 7.81E-22  |
| Tcell down Ebert cell 11                          | 1.4248 | 3.93E-21  | 5.81E-20  |
| BACH2 target ChIPseq                              | 0.6544 | 1.61E-19  | 2.28E-18  |
| Myc ChIP PET 2plus                                | 0.7641 | 6.99E-19  | 9.54E-18  |
| KMT2D DOWN DEGS MOUSE                             | 1.2561 | 3.14E-18  | 4.13E-17  |
| c2.Crebbp.down 295                                | 1.9516 | 3.77E-18  | 4.62E-17  |
| c2.Crebbp.down 500                                | 1.9516 | 3.77E-18  | 4.62E-17  |
| HSC up Ebert cell 11                              | 1.2636 | 2.57E-17  | 3.04E-16  |
| LZvsDZ Teater CC Up vs CB                         | 1.6479 | 7.79E-17  | 8.92E-16  |
| Lymph node DLBCL                                  | 2.1726 | 7.43E-16  | 8.24E-15  |
| Monocyte 4x U133plus                              | 1.9143 | 1.65E-15  | 1.77E-14  |
| c2.Ep300.down 468                                 | 1.5897 | 3.76E-14  | 3.92E-13  |
| GCB BCL6SMRT Distal Enhancer                      | 1.4240 | 5.27E-14  | 5.34E-13  |
| NB GCB Progression All Genes RPKM minus2          | 0.9663 | 7.14E-13  | 7.05E-12  |
| mouse.shCrebbp.r2.0 p.1000 down                   | 1.4176 | 1.25E-12  | 1.20E-11  |
| GC T helper up2x Chtanova                         | 1.4459 | 1.91E-12  | 1.78E-11  |
| Resting monocyte GNF                              | 1.9202 | 5.85E-12  | 5.33E-11  |
| c1.Ep300.down 692                                 | 1.2137 | 7.86E-12  | 6.98E-11  |
| CNS PNS Node1663                                  | 1.7045 | 8.92E-12  | 7.72E-11  |
| ly1.enhancer.INTRONIC.DISTAL.BCL6-SMRT.DRE.1275   | 0.9066 | 1.75E-11  | 1.48E-10  |
| CTCF CB prom                                      | 0.6723 | 1.84E-11  | 1.52E-10  |
| HSC e-ERY down Ebert cell 11                      | 1.1908 | 3.20E-11  | 2.59E-10  |
| Monocyte 8x U133plus                              | 2.1260 | 2.44E-10  | 1.93E-09  |
| NB GCB Progression All Genes RPKM plus2           | 0.8559 | 3.39E-10  | 2.62E-09  |
| HIF1alpha 1.5x Up                                 | 1.8376 | 1.57E-09  | 1.19E-08  |

|                                                               |        |          |          |
|---------------------------------------------------------------|--------|----------|----------|
| CTCF NB prom                                                  | 0.5993 | 2.54E-09 | 1.88E-08 |
| CNS Node1661                                                  | 2.1926 | 2.65E-09 | 1.92E-08 |
| NFkB Targets                                                  | 1.8678 | 3.53E-09 | 2.51E-08 |
| NB GCB Progression All Genes RPKM enhancer loss minus3 minus4 | 1.2227 | 4.00E-09 | 2.78E-08 |
| MD901.loss.25.enhancer.g                                      | 0.5342 | 7.16E-09 | 4.89E-08 |
| ERY down Ebert cell 11                                        | 0.6899 | 7.82E-09 | 5.24E-08 |
| P300 Iy1 enhancer                                             | 0.8580 | 8.26E-09 | 5.43E-08 |
| CD8 T effectorDn memoryIm NaiveUp                             | 2.9516 | 8.54E-09 | 5.51E-08 |
| NFkB all OCILy3 Ly10                                          | 2.3063 | 9.17E-09 | 5.82E-08 |
| c1.Crebbp.down 500                                            | 1.4078 | 1.00E-08 | 6.23E-08 |
| BCL6 target ChIPseq                                           | 0.5000 | 1.62E-08 | 9.89E-08 |
| Iy1.promoter.BCL6.all.3140                                    | 0.4995 | 1.67E-08 | 1.00E-07 |
| Dendritic cell CD123pos blood                                 | 1.3693 | 2.18E-08 | 1.27E-07 |
| EZH2 mut down 347 Ash FL                                      | 1.2968 | 2.18E-08 | 1.27E-07 |
| IRF3 target gene                                              | 1.6677 | 2.63E-08 | 1.51E-07 |
| c3.Crebbp.down 500                                            | 1.5593 | 3.34E-08 | 1.88E-07 |
| NFkB Targets Young.Lab                                        | 1.5783 | 3.98E-08 | 2.21E-07 |
| HRAS overexpression 2x up                                     | 1.7030 | 4.63E-08 | 2.53E-07 |
| MD901.loss.5.enhancer.g                                       | 0.7749 | 5.55E-08 | 2.99E-07 |
| NB GCB Progression All Genes RPKM plus5                       | 1.2644 | 6.09E-08 | 3.23E-07 |
| Iy1.enhancer.INTRONIC.BCL6-SMRT.DRE.807                       | 0.8951 | 7.17E-08 | 3.74E-07 |
| GC T helper up4x Chtanova                                     | 1.6722 | 7.36E-08 | 3.79E-07 |
| GCB.promoter.BCL6.all.5541                                    | 0.3416 | 8.76E-08 | 4.44E-07 |
| GCB.promoter.BCL6-BCOR.all.5451                               | 0.3375 | 1.70E-07 | 8.48E-07 |
| Iy1.enhancer.DISTAL.BCL6-SMRT.DRE.553                         | 1.0771 | 1.73E-07 | 8.52E-07 |
| MEIS1 target ChIPseq Ebert Cell 11                            | 1.0013 | 2.92E-07 | 1.42E-06 |
| GC B cell BLow DLBCLhigh                                      | 2.4456 | 3.02E-07 | 1.45E-06 |
| Thymic SP CD4+Tcell gt Blood CD4+Tcell                        | 2.0460 | 4.28E-07 | 2.02E-06 |
| GC B cell U133Plus                                            | 1.3004 | 5.15E-07 | 2.41E-06 |
| IL6 Ly10 Up all                                               | 2.4821 | 6.33E-07 | 2.92E-06 |
| PU.1 NB prom                                                  | 0.4148 | 6.97E-07 | 3.17E-06 |
| c3.Crebbp.up 500                                              | 1.6364 | 1.05E-06 | 4.74E-06 |
| Enhancer loss.ATAC.reads CREBBP.KD                            | 0.8921 | 1.64E-06 | 7.27E-06 |
| PU.1 CB prom                                                  | 0.4462 | 1.72E-06 | 7.52E-06 |
| 161 ANTIGEN or MHC combined                                   | 1.5540 | 1.80E-06 | 7.81E-06 |
| Resting dendritic cell GNF                                    | 1.9066 | 1.84E-06 | 7.88E-06 |
| B cell up anergy                                              | 2.9796 | 2.35E-06 | 9.93E-06 |
| NB GCB Progression All Genes RPKM enhancer gain plus3 plus4   | 1.1732 | 3.13E-06 | 1.29E-05 |
| NB GCB Progression All Genes RPKM plus10                      | 1.1732 | 3.13E-06 | 1.29E-05 |
| Thymic SP CD4+Tcell gt Thymic DP Tcell                        | 1.6748 | 3.42E-06 | 1.40E-05 |
| Quiescence heme cluster1                                      | 1.5023 | 3.47E-06 | 1.40E-05 |
| IKZF1 CB enhancer                                             | 1.0284 | 3.53E-06 | 1.41E-05 |
| Iy1.promoter.BCL6-SMRT.all.451                                | 1.0143 | 3.62E-06 | 1.43E-05 |
| Myeloid Node1536                                              | 2.8971 | 4.01E-06 | 1.55E-05 |
| NB GCB Progression All Genes RPKM minus5                      | 1.1964 | 3.98E-06 | 1.55E-05 |
| Myc ChIP PET Expr Down                                        | 1.2062 | 4.68E-06 | 1.77E-05 |
| mouse.shCrebbp.r2.down p.500                                  | 1.2731 | 4.65E-06 | 1.77E-05 |
| Bcell down Ebert cell 11                                      | 1.1548 | 5.67E-06 | 2.12E-05 |
| IL10 OCILy3 Up                                                | 1.5767 | 6.06E-06 | 2.24E-05 |
| ABC gt GCB Affy                                               | 2.8191 | 6.56E-06 | 2.40E-05 |
| Serum response Fb up                                          | 1.3381 | 8.08E-06 | 2.93E-05 |
| NFkB bothOCILy3andLy10                                        | 2.2786 | 8.80E-06 | 3.16E-05 |



|                                                                   |        |           |           |
|-------------------------------------------------------------------|--------|-----------|-----------|
| Dendritic cell CD16pos blood                                      | 2.2411 | 1.16E-05  | 4.12E-05  |
| HRAS overexpression 4x up                                         | 1.8447 | 1.28E-05  | 4.51E-05  |
| Enhancer gain.ATAC.reads CREBBP.KD                                | 1.4207 | 1.44E-05  | 5.01E-05  |
| Tcell cytokine induced PMBC Bcell induced                         | 2.4821 | 1.64E-05  | 5.64E-05  |
| IFN PMBC 2x Up                                                    | 1.5064 | 2.11E-05  | 7.22E-05  |
| CREBBP.mouse.Chipseq.LOSS.25.enhancer                             | 0.6374 | 2.15E-05  | 7.27E-05  |
| ARID1A mut up 141 Ash FL                                          | 1.4821 | 2.72E-05  | 9.12E-05  |
| Bcell up Ebert cell 11                                            | 0.5840 | 3.31E-05  | 0.0001097 |
| ly1.promoter.BCL6-BCOR.all.2142                                   | 0.4502 | 3.71E-05  | 0.0001211 |
| Tcell up Ebert cell 11                                            | 0.4804 | 3.72E-05  | 0.0001211 |
| Tcell cytokine induced IL2 IL7 IL15only                           | 2.7045 | 4.70E-05  | 0.0001517 |
| IKZF1 CB all                                                      | 0.6137 | 4.83E-05  | 0.0001543 |
| Tcell Plrep CalciumDefPtup4x Feske Fig6                           | 2.0346 | 5.05E-05  | 0.0001601 |
| HSC e-ERY up Ebert cell 11                                        | 0.4773 | 9.72E-05  | 0.0003053 |
| IKAROS target ChIPseq Young Ebert Cell 11                         | 0.6312 | 0.000134  | 0.0004174 |
| MCL gt SLL DLBCL                                                  | 2.7451 | 0.0001398 | 0.0004315 |
| Quiescence heme all                                               | 1.0156 | 0.0001541 | 0.0004715 |
| PMBL HL high                                                      | 1.7694 | 0.0001584 | 0.0004805 |
| ly1.promoter.BCL6.SMRT.BCOR.341                                   | 0.9598 | 0.0001616 | 0.0004862 |
| Tcell Plind CsAdown4x                                             | 1.7451 | 0.0001873 | 0.0005588 |
| NB GCB Progression All Genes RPKM minus10                         | 1.5890 | 0.0001897 | 0.0005613 |
| Tcell Plind4x CsAindependent                                      | 2.6520 | 0.0002124 | 0.000623  |
| GCB.promoter.BCL6.SMRT.BCOR.1306                                  | 0.5144 | 0.0002175 | 0.0006278 |
| GCB.promoter.BCL6-SMRT.all.1306                                   | 0.5144 | 0.0002175 | 0.0006278 |
| IRF4 myeloma induced Lymphochip                                   | 1.3422 | 0.0002409 | 0.0006896 |
| GCB.promoter.BCL6-BCOR.only.4145                                  | 0.2779 | 0.0002626 | 0.0007458 |
| p53 targets                                                       | 1.4232 | 0.0002733 | 0.0007699 |
| IL6 Ly10 Up group1                                                | 2.3509 | 0.0002782 | 0.0007778 |
| CD40 upregulated Burkitt lymphoma                                 | 1.4662 | 0.0003013 | 0.0008291 |
| STAT3high ABC DLBCL subgroup                                      | 1.4662 | 0.0003013 | 0.0008291 |
| Intron gain.ATAC.reads CREBBP.KD                                  | 1.6520 | 0.0003527 | 0.0009632 |
| Regulatory Tcell FOXP3+ 3x gt CD4+Tcell                           | 2.2895 | 0.0003727 | 0.00101   |
| IFN PMBC 4x Up                                                    | 1.6297 | 0.0004094 | 0.0010982 |
| Intron loss.ATAC.reads CREBBP.KD                                  | 0.9918 | 0.0004114 | 0.0010982 |
| ABC gt GCB LC                                                     | 2.8040 | 0.0004171 | 0.001105  |
| Regulatory T cell McHugh Herman concensus                         | 2.4821 | 0.000444  | 0.0011676 |
| Blood CD4+Tcell gt thymic SP CD4+Tcell                            | 1.8040 | 0.0004499 | 0.0011744 |
| TAL1 target ChIPseq Ebert Cell 11                                 | 1.6936 | 0.0004756 | 0.0012324 |
| I-ERY down Ebert cell 11                                          | 0.3584 | 0.0005232 | 0.0013418 |
| GO ANTIGEN PROCESSING AND PRESENTATION                            | 1.0596 | 0.0005254 | 0.0013418 |
| Plasma cell gt mature Bcell                                       | 2.0227 | 0.0005703 | 0.0014462 |
| GO REGULATION OF ANTIGEN PROCESSING AND PRESENTATION              | 2.4041 | 0.0006164 | 0.0015518 |
| mouse shCrebbp.r2.up 328                                          | 0.9702 | 0.0006526 | 0.0016315 |
| JAK IL10 Ly10 Up                                                  | 1.9796 | 0.0007072 | 0.0017557 |
| IL6 Ly10 Up group2                                                | 3.0671 | 0.0007269 | 0.0017921 |
| Dendritic cell CD123pos tonsil                                    | 2.3301 | 0.0008363 | 0.0020476 |
| Myeloma MF subgroup down                                          | 1.9378 | 0.0008694 | 0.0020995 |
| LSC 42 Dick NatMed 11                                             | 1.9378 | 0.0008694 | 0.0020995 |
| Tcell cytokine induced IL2 IL7 IL15 IL4                           | 2.5816 | 0.0009536 | 0.0022567 |
| Distal loss.ATAC.reads CREBBP.KD                                  | 0.7941 | 0.0009482 | 0.0022567 |
| GO BP MM ANTIGEN PROCESSING AND PRESENTATION OF EXOGENOUS PEPTIDE | 2.5816 | 0.0009536 | 0.0022567 |

|                                                                                              |        |           |           |
|----------------------------------------------------------------------------------------------|--------|-----------|-----------|
| ANTIGEN VIA MHC CLASS II                                                                     |        |           |           |
| Tcell Plind4x Feske Fig6                                                                     | 1.3666 | 0.0009622 | 0.002262  |
| STAT3 up OCILy10                                                                             | 1.8971 | 0.00106   | 0.0024757 |
| HIF1alpha 2x Up                                                                              | 1.6341 | 0.0011895 | 0.00276   |
| Distal gain.ATAC.reads CREBBP.KD                                                             | 1.3925 | 0.0012177 | 0.0028071 |
| Myeloma MS subgroup up                                                                       | 1.8576 | 0.0012826 | 0.0029376 |
| IRF4 myeloma induced all                                                                     | 0.8498 | 0.0013297 | 0.0030259 |
| CLL mutated gt CLL unmutated                                                                 | 2.4821 | 0.0013604 | 0.0030762 |
| Cell cycle Cho                                                                               | 0.6716 | 0.0015869 | 0.0035654 |
| Pancreas Node1629                                                                            | 2.7451 | 0.0019801 | 0.0043933 |
| Regulatory Tcell FOXP3+ 4x gt CD4+Tcell                                                      | 2.7451 | 0.0019801 | 0.0043933 |
| c1.Crebbp.up 198                                                                             | 1.1602 | 0.0020647 | 0.0045525 |
| TGFbeta up epithelial large                                                                  | 1.7451 | 0.00218   | 0.0047771 |
| BCL6 repressed                                                                               | 2.3015 | 0.0025367 | 0.0055248 |
| GO ANTIGEN PROCESSING AND PRESENTATION OF PEPTIDE ANTIGEN                                    | 0.9881 | 0.0026692 | 0.0057779 |
| ly1.promoter.BCL6-SMRT.only.93                                                               | 1.3301 | 0.0026925 | 0.0057929 |
| CD8 T effectorUp memoryIm NaiveDn                                                            | 2.0082 | 0.0029575 | 0.0063248 |
| Tcell Plind4x Feske Fig4                                                                     | 1.3122 | 0.002993  | 0.0063623 |
| Myeloma LB subgroup up                                                                       | 1.7870 | 0.0034357 | 0.0071627 |
| Tcell cytokine repressed                                                                     | 1.7870 | 0.0034357 | 0.0071627 |
| LPC LSC 52 Alizadeh JAMA 10                                                                  | 1.7870 | 0.0034357 | 0.0071627 |
| NK up Ebert cell 11                                                                          | 1.2284 | 0.0034502 | 0.0071627 |
| Tcell cytokine induced PBMC Bcell nochange                                                   | 1.9516 | 0.0036534 | 0.0075404 |
| KLF2 induced                                                                                 | 1.1602 | 0.0038162 | 0.0078309 |
| ly1.promoter.BCL6.alone.906                                                                  | 0.4840 | 0.0039351 | 0.0080285 |
| GCB.DLBCL 1085 intersectSignature Matt                                                       | 0.4300 | 0.0046849 | 0.0095037 |
| Tcell cytokine induced PMBConly linduced                                                     | 1.7045 | 0.0048055 | 0.0096929 |
| ly1.promoter.BCL6-BCOR.only.1783                                                             | 0.3359 | 0.0048696 | 0.0097668 |
| Blimp Bcell repressed                                                                        | 1.4296 | 0.0055759 | 0.0111205 |
| GO POSITIVE REGULATION OF ANTIGEN PROCESSING AND PRESENTATION                                | 2.3666 | 0.0058372 | 0.0115765 |
| E2F3 overexpression 2x up                                                                    | 1.0800 | 0.0062888 | 0.0124029 |
| Myeloma TACI high bone marrow plasma cell gene                                               | 1.2411 | 0.0064114 | 0.0125749 |
| Myc ChIP PET 3plus                                                                           | 0.6520 | 0.0069656 | 0.0135868 |
| HRAS overexpression 2x down                                                                  | 1.4821 | 0.0070208 | 0.013599  |
| Tcell Plrep4x Feske Fig6                                                                     | 1.3790 | 0.0070485 | 0.013599  |
| NFkB OCILy10 only                                                                            | 2.2597 | 0.0077906 | 0.0149496 |
| PAX5 repressed                                                                               | 1.3544 | 0.007888  | 0.0150551 |
| Tcell Plind CalciumDefPtDown4x Feske Fig6                                                    | 1.2597 | 0.0083453 | 0.0158427 |
| CREBBP mut down 278 Ash FL                                                                   | 0.7451 | 0.0092974 | 0.0175562 |
| GC B cell BL equal DLBCL                                                                     | 0.8474 | 0.0095358 | 0.0179112 |
| Resting blood NK cell GNF                                                                    | 1.5169 | 0.0099944 | 0.0186738 |
| T NK Node1604                                                                                | 2.1602 | 0.0101289 | 0.0188259 |
| CD4 T U133plus                                                                               | 3.4821 | 0.0102466 | 0.0189456 |
| GO ANTIGEN PROCESSING AND PRESENTATION OF PEPTIDE OR POLYSACCHARIDE ANTIGEN VIA MHC CLASS II | 1.1342 | 0.0110841 | 0.0203878 |
| HSC down Ebert cell 11                                                                       | 1.3666 | 0.0113576 | 0.0207833 |
| Endothelial precursor GNF                                                                    | 1.6076 | 0.0123193 | 0.0224275 |
| CREBBP mut up 334 Ash FL                                                                     | 0.6621 | 0.0125636 | 0.0227555 |
| NFkB OCILy3 only                                                                             | 2.4821 | 0.0135619 | 0.024439  |
| Resting panT cell CD4+CD8+ GNF                                                               | 1.2146 | 0.0146165 | 0.0262063 |
| c1.Ep300.up 381                                                                              | 0.6265 | 0.0151785 | 0.0270772 |

|                                                                                     |        |           |           |
|-------------------------------------------------------------------------------------|--------|-----------|-----------|
| KRAS Up                                                                             | 1.1926 | 0.0160563 | 0.0285    |
| HSC 120 Dick NatMed 11                                                              | 0.9796 | 0.0183206 | 0.0322481 |
| EZH2 mut up 124 Ash FL                                                              | 0.9346 | 0.0183496 | 0.0322481 |
| GO ANTIGEN PROCESSING AND PRESENTATION VIA MHC CLASS IB                             | 2.3301 | 0.0185256 | 0.032397  |
| IRF4 myeloma induced direct                                                         | 1.4821 | 0.0186254 | 0.0324118 |
| Resting blood B cell GNF                                                            | 1.1495 | 0.0192434 | 0.033324  |
| ERY up Ebert cell 11                                                                | 0.3266 | 0.0198708 | 0.0342433 |
| KRAS Down                                                                           | 1.2895 | 0.0228546 | 0.039195  |
| GC T helper down Kim                                                                | 1.8191 | 0.0237942 | 0.0405564 |
| Myeloma MF subgroup up                                                              | 1.4041 | 0.0238769 | 0.0405564 |
| BreastCa 70gene Good                                                                | 2.1926 | 0.0243607 | 0.0406012 |
| CD8 T effectorDn memoryDn NaiveUp                                                   | 2.1926 | 0.0243607 | 0.0406012 |
| GO REGULATION OF ANTIGEN PROCESSING AND PRESENTATION OF PEPTIDE ANTIGEN             | 2.1926 | 0.0243607 | 0.0406012 |
| GO BP MM INFLAMMATORY RESPONSE TO ANTIGENIC STIMULUS                                | 2.1926 | 0.0243607 | 0.0406012 |
| GC B cell BLhigh DLBCLlow                                                           | 1.5310 | 0.0269256 | 0.0446663 |
| Tcell Plrep CsAup4x                                                                 | 1.7451 | 0.0283741 | 0.0468502 |
| Myeloma CD-2 subgroup up                                                            | 1.3301 | 0.0300362 | 0.0491376 |
| Myeloma LB subgroup down                                                            | 1.3301 | 0.0300362 | 0.0491376 |
| CD40 downregulated Burkitt lymphoma                                                 | 1.1129 | 0.03036   | 0.0494394 |
| B cell down anergy                                                                  | 2.7451 | 0.0315164 | 0.0510883 |
| CLL unmutated gt CLL mutated                                                        | 1.6748 | 0.0334415 | 0.0537671 |
| Splenic marginal zone Bcell gt GC Bcell                                             | 1.2945 | 0.0334719 | 0.0537671 |
| Notch T-ALL down Palomero                                                           | 1.9516 | 0.038637  | 0.0617844 |
| Dendritic cell BDCA3pos blood                                                       | 1.0447 | 0.0388286 | 0.0618124 |
| Tcell Plind CalciumDefPtdown4x Feske Fig4                                           | 1.1195 | 0.0405099 | 0.0642009 |
| IKZF1 CB prom                                                                       | 0.3580 | 0.041375  | 0.0652806 |
| DC TLR4 TLR8 synergy                                                                | 1.5435 | 0.0450561 | 0.069811  |
| OCAB up                                                                             | 2.4821 | 0.0454263 | 0.069811  |
| PMBLhigh HLlow                                                                      | 2.4821 | 0.0454263 | 0.069811  |
| GO ANTIGEN PROCESSING AND PRESENTATION OF ENDOGENOUS ANTIGEN                        | 1.5435 | 0.0450561 | 0.069811  |
| GO BP MM POSITIVE REGULATION OF MHC CLASS II BIOSYNTHETIC PROCESS                   | 2.4821 | 0.0454263 | 0.069811  |
| GO BP MM POSITIVE REGULATION OF DENDRITIC CELL ANTIGEN PROCESSING AND PRESENTATION  | 2.4821 | 0.0454263 | 0.069811  |
| Pan B U133plus                                                                      | 0.9585 | 0.0523841 | 0.0801567 |
| KLF2 repressed                                                                      | 0.8344 | 0.0534464 | 0.0810832 |
| GO ANTIGEN PROCESSING AND PRESENTATION OF PEPTIDE ANTIGEN VIA MHC CLASS I           | 0.8344 | 0.0534464 | 0.0810832 |
| BreastCa 70gene Bad                                                                 | 1.2597 | 0.0550174 | 0.0827592 |
| Follicular lymphoma Immune Response1                                                | 1.2597 | 0.0550174 | 0.0827592 |
| Follicular dendritic cell                                                           | 4.0671 | 0.059661  | 0.0857475 |
| GO BP MM POSITIVE REGULATION OF TOLERANCE INDUCTION TO SELF ANTIGEN                 | 4.0671 | 0.059661  | 0.0857475 |
| GO MF MM ENDOGENOUS LIPID ANTIGEN BINDING                                           | 4.0671 | 0.059661  | 0.0857475 |
| GO BP MM NEGATIVE REGULATION OF CHRONIC INFLAMMATORY RESPONSE TO ANTIGENIC STIMULUS | 4.0671 | 0.059661  | 0.0857475 |

|                                                                                    |        |           |           |
|------------------------------------------------------------------------------------|--------|-----------|-----------|
| GO BP MM REGULATION OF TOLERANCE INDUCTION TO SELF ANTIGEN                         | 4.0671 | 0.059661  | 0.0857475 |
| GO BP MM ANTIGEN TRANSCYTOSIS BY M CELLS IN MUCOSAL-ASSOCIATED LYMPHOID TISSUE     | 4.0671 | 0.059661  | 0.0857475 |
| GO BP MM NEGATIVE REGULATION OF ACUTE INFLAMMATORY RESPONSE TO ANTIGENIC STIMULUS  | 4.0671 | 0.059661  | 0.0857475 |
| GO BP MM MHC CLASS II BIOSYNTHETIC PROCESS                                         | 4.0671 | 0.059661  | 0.0857475 |
| GO BP MM REGULATION OF MHC CLASS I BIOSYNTHETIC PROCESS                            | 4.0671 | 0.059661  | 0.0857475 |
| GO BP MM NEGATIVE REGULATION PEPTIDE OR POLYSACCHARIDE ANTIGEN VIA MHC CLASS II    | 4.0671 | 0.059661  | 0.0857475 |
| GO BP MM NEGATIVE REGULATION OF DENDRITIC CELL ANTIGEN PROCESSING AND PRESENTATION | 4.0671 | 0.059661  | 0.0857475 |
| Normal mesenchymal-2 Node1615                                                      | 2.2597 | 0.0611236 | 0.0874954 |
| Notch T-ALL up Weng                                                                | 1.0671 | 0.0645597 | 0.092043  |
| GC T helper up Chtanova and Kim                                                    | 1.6520 | 0.0662957 | 0.0937648 |
| Splenic Marginal zone Bcell gt naive and GC Bcell                                  | 1.6520 | 0.0662957 | 0.0937648 |

**Supplementary Table 8. TET2-deficient and AID-deficient GC B-cells enriched pathways.**

| Pathway                                           | AID(enriched FDR) | TET2(enriched FDR) |
|---------------------------------------------------|-------------------|--------------------|
| CTCF_ly1_all                                      | 1.47E-71          | 1.09E-20           |
| shCrebbp.down_1028                                | 6.24E-60          | 1.42E-19           |
| P300_ly1_all                                      | 4.13E-30          | 4.19E-18           |
| PU.1_NB_all                                       | 4.13E-30          | 4.19E-18           |
| PU.1_CB_all                                       | 1.55E-26          | 1.64E-17           |
| PU.1_CB_enhancer                                  | 5.85E-19          | 2.03E-17           |
| CTCF_NB_all                                       | 2.06E-45          | 9.67E-17           |
| CTCF_CB_all                                       | 1.73E-46          | 5.67E-16           |
| CTCF_ly1_prom                                     | 5.70E-40          | 1.16E-14           |
| BACH2_target_ChIPseq                              | 2.30E-30          | 1.16E-14           |
| PU.1_NB_enhancer                                  | 1.57E-18          | 1.16E-14           |
| CTCF_NB_prom                                      | 1.44E-25          | 2.92E-12           |
| CTCF_ly1_enhancer                                 | 6.32E-40          | 1.53E-11           |
| MD901.loss.25.enhancer.g                          | 6.28E-27          | 1.57E-11           |
| shCrebbp.down_500                                 | 8.25E-19          | 4.18E-11           |
| CTCF_CB_prom                                      | 4.98E-22          | 2.13E-10           |
| PU.1_target_ChIPseq_Ebert_Cell_11                 | 4.63E-13          | 3.89E-10           |
| mouse.shCrebbp.r2.0_p.1000_down                   | 2.66E-19          | 4.06E-10           |
| Myc_ChIP_PET_2plus                                | 1.61E-15          | 1.17E-09           |
| CTCF_NB_enhancer                                  | 3.36E-24          | 3.12E-09           |
| GC_termDiff_Genes                                 | 4.73E-23          | 7.68E-09           |
| CTCF_CB_enhancer                                  | 3.36E-24          | 1.79E-08           |
| MD901.loss.5.enhancer.g                           | 3.63E-15          | 3.53E-08           |
| shEp300.down_636                                  | 2.02E-28          | 9.80E-08           |
| Myc_Targets                                       | 1.16E-17          | 1.08E-07           |
| mouse_shCrebbp.r2.down_545                        | 5.23E-18          | 2.12E-06           |
| GCB.promoter.BCL6.all.5541                        | 3.28E-30          | 2.32E-06           |
| GMP_up_Ebert_cell_11                              | 1.54E-06          | 2.32E-06           |
| CREBBP.mouse.ChIPseq.LOSS.25.prom                 | 1.74E-13          | 2.55E-06           |
| GCB.promoter.BCL6-BCOR.all.5451                   | 1.89E-29          | 3.00E-06           |
| PU.1_NB_prom                                      | 5.30E-13          | 3.45E-06           |
| MD901.loss.25.prom.g                              | 2.06E-28          | 5.24E-06           |
| PU.1_CB_prom                                      | 4.60E-11          | 5.24E-06           |
| CREBBP.mouse.ChIPseq.LOSS.25.enhancer             | 6.22E-10          | 5.73E-06           |
| I-ERY_down_Ebert_cell_11                          | 1.66E-14          | 7.30E-06           |
| P300_ly1_enhancer                                 | 2.42E-08          | 9.77E-06           |
| Tcell_up_Ebert_cell_11                            | 1.70E-10          | 1.55E-05           |
| NB_GCB_Progression_All_Genes_RPKM_minus2.to.plus2 | 1.95E-15          | 2.76E-05           |
| mouse.shCrebbp.r2.down_p.500                      | 4.71E-10          | 3.35E-05           |
| GCB.promoter.BCL6-BCOR.only.4145                  | 1.28E-21          | 5.12E-05           |
| Tcell_Pprep_CalciumDefPtup4x_Feske_Fig6           | 0.022046302       | 5.12E-05           |
| IKZF1_CB_all                                      | 1.74E-06          | 7.59E-05           |
| LZvsDZ_Teater_CC_Up_vs_CB                         | 0.000685044       | 8.07E-05           |
| Myc_ChIP_PET_Expr_Down                            | 0.016484676       | 0.0001021          |
| Hematopoietic_Node1658                            | 0.022692274       | 0.0001021          |
| BCL6_target_ChIPseq                               | 1.45E-12          | 0.00013544         |
| ly1.promoter.BCL6.all.3140                        | 1.50E-12          | 0.00013586         |
| MD901.loss.5.prom.g                               | 1.78E-14          | 0.00014713         |
| HSC_e-ERY_up_Ebert_cell_11                        | 3.30E-25          | 0.00017353         |

|                                                                                            |             |            |
|--------------------------------------------------------------------------------------------|-------------|------------|
| Proliferation_DLBCL                                                                        | 2.41E-13    | 0.00025815 |
| GO_ANTIGEN_PROCESSING_AND_PRESENTATION_OF_PEPTIDE_ANTIGEN_VIA_MHC_CLASS_I                  | 0.009607981 | 0.00044057 |
| GO_ANTIGEN_PROCESSING_AND_PRESENTATION                                                     | 0.025625032 | 0.00052699 |
| Myeloma_MF_subgroup_up                                                                     | 0.000148304 | 0.00067283 |
| EZH2_mut_up_124_Ash_FL                                                                     | 0.291367293 | 0.00067283 |
| HSC_e-ERY_down_Ebert_cell_11                                                               | 0.000311769 | 0.00067593 |
| IKZF1_CB_enhancer                                                                          | 0.000311769 | 0.00083786 |
| c3.Crebbp.down_500                                                                         | 0.016290061 | 0.00089506 |
| NB_GCB_Progression_All_Genes_RPKM_plus5                                                    | 0.016458732 | 0.00100242 |
| KMT2D_DOWN_DEGS_MOUSE                                                                      | 0.022692274 | 0.00105515 |
| Blimp_proliferation_repressed                                                              | 0.001323949 | 0.00116316 |
| Proliferation_Node1606                                                                     | 2.21E-07    | 0.00119259 |
| IFN_PMBC_2x_Up                                                                             | 0.000614    | 0.00132924 |
| GO_ANTIGEN_PROCESSING_AND_PRESENTATION_OF_EXOGENOUS_PEPTIDE_ANTIGEN_VIA_MHC_CLASS_I        | 0.026831918 | 0.00165751 |
| GO_BP_MM_ANTIGEN_PROCESSING_AND_PRESENTATION_OF_ENDOGENOUS_PEPTIDE_ANTIGEN_VIA_MHC_CLASS_I | 0.069690287 | 0.00165751 |
| ly1.enhancer.INTRONIC.BCL6-SMRT.DRE.807                                                    | 0.03212458  | 0.0017467  |
| XBP1_target_all                                                                            | 7.95E-06    | 0.003282   |
| GO_ANTIGEN_PROCESSING_AND_PRESENTATION_OF_PEPTIDE_ANTIGEN                                  | 0.031620541 | 0.00330613 |
| HSC_down_Ebert_cell_11                                                                     | 0.004666612 | 0.00377134 |
| KEGG_ANTIGEN_PROCESSING_AND_PRESENTATION                                                   | 0.036058108 | 0.00421296 |
| GCB_BCL6SMRT_Distal_Enhancer                                                               | 0.001737317 | 0.00454579 |
| ly1.promoter.BCL6-BCOR.all.2142                                                            | 2.76E-10    | 0.00481873 |
| NK_down_Ebert_cell_11                                                                      | 2.84E-07    | 0.00493817 |
| ERY_down_Ebert_cell_11                                                                     | 0.001299393 | 0.00494627 |
| P300_ly1_prom                                                                              | 4.80E-12    | 0.00508039 |
| ly1.enhancer.INTRONIC.DISTAL.BCL6-SMRT.DRE.1275                                            | 0.003630785 | 0.00533782 |
| Glutamine_Glucose_starve_both_down                                                         | 1.08E-08    | 0.00561781 |
| c1.Ep300.up_381                                                                            | 1.37E-07    | 0.00561781 |
| Enhancer_loss.ATAC.reads_CREBBP.KD                                                         | 7.40E-05    | 0.00563123 |
| Leucine_starve_up                                                                          | 0.000460671 | 0.00605525 |
| XBP1_target_secretory                                                                      | 0.000704979 | 0.00629955 |
| Tcell_P1rep4x_Feske_Fig6                                                                   | 0.01044834  | 0.00691309 |
| c1.Crebbp.down_397                                                                         | 0.022692274 | 0.00735433 |
| Tcell_down_Ebert_cell_11                                                                   | 8.52E-05    | 0.00846249 |
| Resting_monocyte_GNF                                                                       | 0.053423268 | 0.00846249 |
| Myc_ChIP_PET_Expr_Up                                                                       | 1.63E-09    | 0.00922095 |
| NFkB_Targets_Young.Lab                                                                     | 0.096109442 | 0.00973728 |
| IL10_OCILy3_Up                                                                             | 0.006838889 | 0.01040554 |
| NB_GCB_Progression_All_Genes_RPKM_plus2                                                    | 0.01116681  | 0.012804   |
| Lymph_node_DLBCL                                                                           | 0.022120433 | 0.0134695  |
| ly1.promoter.BCL6-BCOR.only.1783                                                           | 1.48E-07    | 0.01549229 |
| B_cell_up_anergy                                                                           | 0.368395699 | 0.01671149 |
| Distal_loss.ATAC.reads_CREBBP.KD                                                           | 0.001754392 | 0.01671652 |
| GO_CC_MM_MHC_CLASS_I_PEPTIDE_LOADING_COMPLEX                                               | 0.291367293 | 0.01671652 |

|                                                                                            |             |            |
|--------------------------------------------------------------------------------------------|-------------|------------|
| Blimp_Bcell_repressed                                                                      | 0.368829672 | 0.01716499 |
| HIF1alpha_1.5x_Up                                                                          | 0.01066673  | 0.01823231 |
| Glutamine_starve_down                                                                      | 1.31E-06    | 0.01897542 |
| c1.Crebbp.down_500                                                                         | 0.101760436 | 0.0198151  |
| NFkB_Targets                                                                               | 0.03566405  | 0.02068972 |
| 161_ANTIGEN_or_MHC_combined                                                                | 0.16275601  | 0.02112893 |
| IRF3_target_gene                                                                           | 0.058146353 | 0.02136608 |
| MEIS1_target_ChIPseq_Ebert_Cell_11                                                         | 0.002458238 | 0.02195175 |
| GCB_bivalentProm_genes                                                                     | 1.62E-11    | 0.02195653 |
| Ly1_BCL6RD2mut_upreg                                                                       | 0.000106674 | 0.02507041 |
| Leucine_starve_down                                                                        | 0.000685044 | 0.02669243 |
| Pan_B_U133plus                                                                             | 0.046235535 | 0.02669243 |
| Myc_ChIP_PET_3plus                                                                         | 0.013421636 | 0.0282007  |
| Myeloma_HY_subgroup_down                                                                   | 0.093116426 | 0.0282007  |
| I-ERY_up_Ebert_cell_11                                                                     | 4.81E-07    | 0.03012104 |
| IL6_Ly10_Up_all                                                                            | 0.000311769 | 0.03027326 |
| HRAS_overexpression_2x_up                                                                  | 0.210008426 | 0.03070377 |
| c3.Crebbp.up_500                                                                           | 0.029905822 | 0.0317874  |
| Dendritic_cell_CD123pos_blood                                                              | 0.086441999 | 0.03491076 |
| ly1.promoter.BCL6.alone.906                                                                | 0.006185949 | 0.03564387 |
| denovobivGenes                                                                             | 1.66E-06    | 0.03580179 |
| Intron_loss.ATAC.reads_CREBBP.KD                                                           | 0.003526566 | 0.03580179 |
| T_cell                                                                                     | 0.007489716 | 0.03580179 |
| GO_BP_MM_ANTIGEN_PROCESSING_AND_PRESENTATION_OF_EXOGENOUS_PEPTIDE_ANTIGEN_VIA_MHC_CLASS_II | 0.03212458  | 0.03580179 |
| CD40_upregulated_Burkitt_lymphoma                                                          | 0.341466877 | 0.03796932 |
| Resting_blood_NK_cell_GNF                                                                  | 0.136421423 | 0.0424607  |
| c2.Crebbp.down_295                                                                         | 0.003526566 | 0.04327385 |
| c2.Crebbp.down_500                                                                         | 0.003526566 | 0.04327385 |
| T_NK_Node1604                                                                              | 0.01066673  | 0.04397001 |
| GCB.promoter.BCL6-SMRT.all.1306                                                            | 1.03E-06    | 0.05846945 |
| GCB.promoter.BCL6.SMRT.BCOR.1306                                                           | 1.03E-06    | 0.05846945 |
| Notch_T-ALL_up_Sharma                                                                      | 0.020784672 | 0.06036437 |
| IKAROS_target_ChIPseq_Young_Ebert_Cell_11                                                  | 4.64E-05    | 0.0616581  |
| ly1.promoter.BCL6-SMRT.all.451                                                             | 0.001306059 | 0.06515989 |
| Bcell_down_Ebert_cell_11                                                                   | 0.000103692 | 0.06590389 |
| GO_BP_MM_ANTIGEN_PROCESSING_AND_PRESENTATION_OF_EXOGENOUS_PEPTIDE_ANTIGEN_VIA_MHC_CLASS_I  | 0.435247175 | 0.06590389 |
| NB_GCB_Progression_All_Genes_RPKM_minus2                                                   | 0.004665623 | 0.0665098  |
| JAK_IL10_Ly10_Up                                                                           | 0.008502547 | 0.0665098  |
| GO_MF_MM_MHC_CLASS_I_PROTEIN_BINDING                                                       | 0.154019129 | 0.0665098  |
| GO_ANTIGEN_PROCESSING_AND_PRESENTATION_VIA_MHC_CLASS_IB                                    | NA          | 0.0665098  |
| Endothelial_precursor_GNF                                                                  | 0.174868274 | 0.07053869 |
| HIF1alpha_2x_Up                                                                            | 0.022692274 | 0.0719027  |
| Myeloma_TACI_high_bone_marrow_plasma_cell_gene                                             | 0.007082114 | 0.07819874 |
| IRF4_myeloma_induced_all                                                                   | 0.042573559 | 0.0789714  |
| Quiescence_heme_cluster1                                                                   | 0.169138112 | 0.07997643 |
| STAT3_up_OCILy10                                                                           | 0.001262827 | 0.08033321 |
| GMP_down_Ebert_cell_11                                                                     | 0.054487672 | 0.08388987 |
| Tcell_cytokine_induced_IL2_IL7_IL15only                                                    | 0.096109442 | 0.08697712 |

|                                           |             |            |
|-------------------------------------------|-------------|------------|
| ARID1A_mut_up_141_Ash_FL                  | 0.000225466 | 0.09098391 |
| Bcell_up_Ebert_cell_11                    | 0.008427595 | 0.09766132 |
| CREBBP_mut_down_278_Ash_FL                | 2.05E-05    | 0.09829637 |
| ABC_gt_GCB_LC                             | 0.072357188 | 0.10031351 |
| IKZF1_CB_prom                             | 0.004076355 | 0.12075224 |
| Myeloma_CD-1_subgroup_down                | 0.028846856 | 0.12831562 |
| CLL_unmutated_gt_CLL_mutated              | 0.058332071 | 0.12963861 |
| IL6_Ly10_Up_group1                        | 0.02450311  | 0.13813767 |
| Tcell_cytokine_induced_IL2_IL7_IL15_IL4   | 0.03212458  | 0.13813767 |
| KLF2_induced                              | 0.034662173 | 0.13813767 |
| PAX5_repressed                            | 0.022692274 | 0.13832894 |
| Glutamine_starve_up                       | 0.019180578 | 0.14659626 |
| mouse_shCrebbp.r2.up_328                  | 1.07E-06    | 0.147274   |
| p53_targets                               | 0.043226471 | 0.15732263 |
| ERY_up_Ebert_cell_11                      | 6.41E-08    | 0.16541145 |
| Cell_cycle_Cho                            | 0.072896804 | 0.17100362 |
| Myeloma_CD-2_subgroup_down                | 0.00368102  | 0.17124751 |
| Glucose_starve_up                         | 0.032524053 | 0.17869434 |
| IL6_Ly10_Up_group2                        | 0.019209857 | 0.18170586 |
| mouse.shCrebbp.r2.up_p.500                | 0.033608563 | 0.18331803 |
| Reticulocyte_large                        | 0.03212458  | 0.18981108 |
| Ly1_siBCL6_48h_upreg                      | 0.003926958 | 0.19647044 |
| Ribosomal_protein                         | 0.001323949 | 0.20227331 |
| Regulatory_T_cell_McHugh_Herman_concensus | 0.006610756 | 0.20227331 |
| XBP1_target_other                         | 0.007166255 | 0.20227331 |
| KLF2_repressed                            | 0.01066673  | 0.20227331 |
| mouse.shCrebbp.r2.0_p.1000_up             | 0.0002737   | 0.21446663 |
| EZH2_mut_down_347_Ash_FL                  | 0.016484676 | 0.22045291 |
| Myc_RNAi_OCILy3                           | 0.000429148 | 0.22416597 |
| Myc_overexpression_2x_up                  | 0.004411547 | 0.24104483 |
| EP300_mut_down_271_Ash_FL                 | 1.16E-07    | 0.25199026 |
| Quiescence_heme_cluster3                  | 0.054352349 | 0.25199026 |
| HSC_up_Ebert_cell_11                      | 1.34E-06    | 0.25208322 |
| CNS_Node1661                              | 0.040434507 | 0.25208322 |
| STAT3high_ABC_DLBCL_subgroup              | 0.09220422  | 0.26742765 |
| KMT2C_mut_down_214_Ash_FL                 | 0.035309108 | 0.30271318 |
| Notch_T-ALL_down_Palomero                 | 0.091825369 | 0.30271318 |
| BCL6_targets_CHIPCHIP                     | 0.03566405  | 0.30763561 |
| ly1.enhancer.DISTAL.BCL6-SMRT.DRE.553     | 0.031149094 | 0.31540009 |
| Erythroid_precursor_GNF                   | 0.004993067 | 0.31786876 |
| ly1.promoter.BCL6.SMRT.BCOR.341           | 0.006610756 | 0.31911011 |
| Tcell_cytokine_induced_prolif             | 0.042567694 | 0.33421866 |
| GCB.promoter.BCL6.alone.106               | 0.096917969 | 0.3736361  |
| c2.Crebbp.up_205                          | 0.097621462 | 0.3736361  |
| c2.Crebbp.up_500                          | 0.097621462 | 0.3736361  |
| BCL6_repressed                            | 0.004665623 | 0.3847894  |
| Resting_dendritic_cell_GNF                | 0.074249037 | 0.39729193 |
| Myeloma_TACI_low_plasmablast_gene         | 0.081705409 | 0.40226843 |
| c2.Ep300.down_468                         | 0.086441999 | 0.40978062 |
| c1.Crebbp.up_198                          | 0.096109442 | 0.44857895 |
| Serum_response_Fb_down                    | 0.001739318 | 0.46848795 |
| Promoter_loss.ATAC.reads_CREBBP.KD        | 0.094827934 | 0.46848795 |
| Cell_cycle_Whitfield                      | 0.038650906 | 0.51285705 |



|                              |             |            |
|------------------------------|-------------|------------|
| PGC-1alpha_overexpression_up | 0.001074677 | 0.54932556 |
| Myc_overexpression_1.5x_up   | 0.003375371 | NA         |
| Notch_T-ALL_up_Palomero      | 0.019037179 | NA         |
| HIF1alpha_1.5x_down          | 0.02659487  | NA         |
| KMT2D_mut_up_20_Ash_FL       | 0.081705409 | NA         |

**Supplementary Table 9. Number and percentage of clones with at least one C-to-T mutation among clones identified in GC B-cells.**

| Sample           | Total number of clones identified | Number of clones with at least one C-to-T mutation at WRC motif | Percentage of clones with at least one C-to-T mutation among all identified clones |
|------------------|-----------------------------------|-----------------------------------------------------------------|------------------------------------------------------------------------------------|
| TET2 wild-type 1 | 35830                             | 4426                                                            | 12.3528                                                                            |
| TET2 wild-type 2 | 40537                             | 4682                                                            | 11.5499                                                                            |
| TET2 wild-type 3 | 36934                             | 4190                                                            | 11.3446                                                                            |
| TET2 deficient 1 | 47622                             | 5263                                                            | 11.0516                                                                            |
| TET2 deficient 2 | 35030                             | 3984                                                            | 11.3731                                                                            |

**Supplementary Table 10. Mouse and human pathways enriched by hypermethylated genes.**

| Species | pathway                                                                                    | log2FC | p-value  | FDR        |
|---------|--------------------------------------------------------------------------------------------|--------|----------|------------|
| Mouse   | c3.Crebbp.down 500                                                                         | 1.6275 | 2.89E-07 | 6.57E-05   |
| Mouse   | P300 ly1 enhancer                                                                          | 0.7084 | 3.88E-05 | 0.0044072  |
| Mouse   | Pan B U133plus                                                                             | 1.9573 | 0.000207 | 0.01563117 |
| Mouse   | Blimp Bcell repressed                                                                      | 2.1208 | 0.000399 | 0.02262265 |
| Mouse   | B cell down anergy                                                                         | 3.7058 | 0.000903 | 0.03589764 |
| Mouse   | Resting blood B cell GNF                                                                   | 1.8053 | 0.000949 | 0.03589764 |
| Mouse   | Ly1 BCL6RD2mut upreg                                                                       | 0.4588 | 0.00217  | 0.05908272 |
| Mouse   | mouse.shCrebbp.r2.down p.500                                                               | 1.0396 | 0.002342 | 0.05908272 |
| Mouse   | LZvsDZ Teater CC Up vs CB                                                                  | 0.8535 | 0.001852 | 0.05908272 |
| Mouse   | Myc ChIP PET 2plus                                                                         | 0.2917 | 0.002974 | 0.0613769  |
| Mouse   | GO BP MM ANTIGEN PROCESSING AND PRESENTATION OF EXOGENOUS PEPTIDE ANTIGEN VIA MHC CLASS II | 3.2203 | 0.002948 | 0.0613769  |
| Mouse   | GCB bivalent Prom genes                                                                    | 0.3791 | 0.003761 | 0.07113932 |
| Mouse   | denovobivGenes                                                                             | 0.5321 | 0.004649 | 0.08118707 |
| Mouse   | KLF2 induced                                                                               | 1.2439 | 0.006635 | 0.08704311 |
| Mouse   | ly1.promoter.BCL6-SMRT.all.451                                                             | 0.7259 | 0.007286 | 0.08704311 |
| Mouse   | mouse shCrebbp.r2.down 545                                                                 | 0.7588 | 0.005421 | 0.08704311 |
| Mouse   | mouse.shCrebbp.r2.0 p.1000 down                                                            | 0.7148 | 0.007035 | 0.08704311 |
| Mouse   | c1.Crebbp.down 500                                                                         | 0.8463 | 0.006879 | 0.08704311 |
| Mouse   | KEGG ANTIGEN PROCESSING AND PRESENTATION                                                   | 1.6651 | 0.006    | 0.08704311 |
| Mouse   | CD40 upregulated Burkitt lymphoma                                                          | 1.3459 | 0.0086   | 0.09778529 |
| Human   | EZH2_target_ChIP                                                                           | 1.6531 | 1.26E-26 | 1.68E-24   |
| Human   | GCB_bivalentProm_genes                                                                     | 1.3105 | 6.22E-15 | 4.17E-13   |
| Human   | CNS_PNS_Node1663                                                                           | 1.7255 | 9.45E-06 | 0.00042195 |
| Human   | CTCF_CB_all                                                                                | 0.2726 | 1.96E-05 | 0.00065695 |
| Human   | Ly1_BCL6RD2mut_upreg                                                                       | 0.8671 | 5.52E-05 | 0.00147992 |
| Human   | CTCF_CB_enhancer                                                                           | 0.2976 | 0.000122 | 0.00233509 |
| Human   | c1.Crebbp.up_198                                                                           | 2.1034 | 0.000114 | 0.00233509 |
| Human   | CTCF_ly1_enhancer                                                                          | 0.1964 | 0.00016  | 0.0026871  |
| Human   | CTCF_CB_prom                                                                               | 0.6047 | 0.000303 | 0.00451599 |
| Human   | E2F3_overexpression_4x_up                                                                  | 2.7381 | 0.000848 | 0.01127455 |
| Human   | Resting_monocyte_GNF                                                                       | 1.8453 | 0.000926 | 0.01127455 |
| Human   | CTCF_NB_all                                                                                | 0.2209 | 0.001397 | 0.01560155 |
| Human   | CTCF_NB_enhancer                                                                           | 0.2635 | 0.001633 | 0.01562713 |
| Human   | CTCF_ly1_all                                                                               | 0.1249 | 0.001542 | 0.01562713 |

|       |                                                   |        |          |            |
|-------|---------------------------------------------------|--------|----------|------------|
| Human | E2F3_overexpression_2x_up                         | 1.7572 | 0.002592 | 0.02315555 |
| Human | denovobivGenes                                    | 0.8135 | 0.003175 | 0.02659127 |
| Human | Enhancer_loss.ATAC.reads_CREBBP.KD                | 0.8899 | 0.004083 | 0.03218432 |
| Human | SREBP1a&2_up_Scap_indep                           | 3.0791 | 0.004972 | 0.03701668 |
| Human | Myeloma_TACI_high_bone_marrow_plasma_cell_gene    | 1.8567 | 0.006275 | 0.04425301 |
| Human | c2.Ep300.down_468                                 | 1.0748 | 0.007151 | 0.04791461 |
| Human | Distal_loss.ATAC.reads_CREBBP.KD                  | 1.0202 | 0.00764  | 0.04874729 |
| Human | NB_GCB_Progression_All_Genes_RPKM_minus2.to_plus2 | 0.3076 | 0.009675 | 0.05892931 |
| Human | GC_termDiff_Genes                                 | 0.5730 | 0.01147  | 0.06682486 |
| Human | Bcell_down_Ebert_cell_11                          | 1.1179 | 0.013225 | 0.07384086 |
| Human | Resting_dendritic_cell_GNF                        | 1.7381 | 0.017063 | 0.09145995 |
| Human | mouse.shCrebbp.r2.down_p.500                      | 1.1829 | 0.01839  | 0.09477701 |
| Human | GC_T_helper_up4x_Chtanova                         | 1.3319 | 0.021761 | 0.09705152 |
| Human | GC_T_helper_up_Kim                                | 1.9092 | 0.021657 | 0.09705152 |
| Human | Lung_Node3969                                     | 3.0791 | 0.022452 | 0.09705152 |
| Human | Ly1_siBCL6_48h_upreg                              | 0.5635 | 0.022354 | 0.09705152 |
| Human | Distal_gain.ATAC.reads_CREBBP.KD                  | 1.4942 | 0.02004  | 0.09705152 |

## REFERENCES AND NOTES

1. D. Hu, A. Shilatifard, Epigenetics of hematopoiesis and hematological malignancies. *Genes Dev.* **30**, 2021–2041 (2016).
2. C. Mlynarczyk, L. Fontán, A. Melnick, Germinal center-derived lymphomas: The darkest side of humoral immunity. *Immunol. Rev.* **288**, 214–239 (2019).
3. Y. Jiang, P. M. Dominguez, A. M. Melnick, The many layers of epigenetic dysfunction in B-cell lymphomas. *Curr. Opin. Hematol.* **23**, 377–384 (2016).
4. A. Alhejaily, A. G. Day, H. E. Feilotter, T. Baetz, D. P. Lebrun, Inactivation of the *CDKN2A* tumor-suppressor gene by deletion or methylation is common at diagnosis in follicular lymphoma and associated with poor clinical outcome. *Clin. Cancer Res.* **20**, 1676–1686 (2014).
5. N. Chambwe, M. Kormaksson, H. Geng, S. De, F. Michor, N. A. Johnson, R. D. Morin, D. W. Scott, L. A. Godley, R. D. Gascoyne, A. Melnick, F. Campagne, R. Shaknovich, Variability in DNA methylation defines novel epigenetic subgroups of DLBCL associated with different clinical outcomes. *Blood* **123**, 1699–1708 (2014).
6. S. De, R. Shaknovich, M. Riester, O. Elemento, H. Geng, M. Kormaksson, Y. Jiang, B. Woolcock, N. Johnson, J. M. Polo, L. Cerchietti, R. D. Gascoyne, A. Melnick, F. Michor, Aberration in DNA methylation in B-cell lymphomas has a complex origin and increases with disease severity. *PLOS Genet.* **9**, e1003137 (2013).
7. T. Clozel, S. Yang, R. L. Elstrom, W. Tam, P. Martin, M. Kormaksson, S. Banerjee, A. Vasanthakumar, B. Culjkovic, D. W. Scott, S. Wyman, M. Leser, R. Shaknovich, A. Chadburn, F. Tabbo, L. A. Godley, R. D. Gascoyne, K. L. Borden, G. Inghirami, J. P. Leonard, A. Melnick, L. Cerchietti, Mechanism-based epigenetic chemosensitization therapy of diffuse large B-cell lymphoma. *Cancer Discov.* **3**, 1002–1019 (2013).
8. A. M. Deaton, A. Bird, CpG islands and the regulation of transcription. *Genes Dev.* **25**, 1010–1022 (2011).

9. X. Wu, Y. Zhang, TET-mediated active DNA demethylation: Mechanism, function and beyond. *Nat. Rev. Genet.* **18**, 517–534 (2017).
10. R. Rampal, A. Alkalin, J. Madzo, A. Vasanthakumar, E. Pronier, J. Patel, Y. Li, J. Ahn, O. Abdel-Wahab, A. Shih, C. Lu, P. S. Ward, J. J. Tsai, T. Hricik, V. Tosello, J. E. Tallman, X. Zhao, D. Daniels, Q. Dai, L. Ciminio, I. Aifantis, C. He, F. Fuks, M. S. Tallman, A. Ferrando, S. Nimer, E. Paietta, C. B. Thompson, J. D. Licht, C. E. Mason, L. A. Godley, A. Melnick, M. E. Figueroa, R. L. Levine, DNA hydroxymethylation profiling reveals that *WT1* mutations result in loss of TET2 function in acute myeloid leukemia. *Cell Rep.* **9**, 1841–1855 (2014).
11. G. C. Hon, C.-X. Song, T. du, F. Jin, S. Selvaraj, A. Y. Lee, C. A. Yen, Z. Ye, S.-Q. Mao, B.-A. Wang, S. Kuan, L. E. Edsall, B. S. Zhao, G.-L. Xu, C. He, B. Ren, 5mC oxidation by Tet2 modulates enhancer activity and timing of transcriptome reprogramming during differentiation. *Mol. Cell* **56**, 286–297 (2014).
12. F. Asmar, V. Punj, J. Christensen, M. T. Pedersen, A. Pedersen, A. B. Nielsen, C. Hother, U. Ralfkiaer, P. Brown, E. Ralfkiaer, K. Helin, K. Grønbaek, Genome-wide profiling identifies a DNA methylation signature that associates with *TET2* mutations in diffuse large B-cell lymphoma. *Haematologica* **98**, 1912–1920 (2013).
13. A. Reddy, J. Zhang, N. S. Davis, A. B. Moffitt, C. L. Love, A. Waldrop, S. Leppa, A. Pasanen, L. Meriranta, M. L. Karjalainen-Lindsberg, P. Nørgaard, M. Pedersen, A. O. Gang, E. Høgdall, T. B. Heavican, W. Lone, J. Iqbal, Q. Qin, G. Li, S. Y. Kim, J. Healy, K. L. Richards, Y. Fedoriw, L. Bernal-Mizrachi, J. L. Koff, A. D. Staton, C. R. Flowers, O. Paltiel, N. Goldschmidt, M. Calaminici, A. Clear, J. Gribben, E. Nguyen, M. B. Czader, S. L. Ondrejka, A. Collie, E. D. Hsi, E. Tse, R. K. H. Au-Yeung, Y.-L. Kwong, G. Srivastava, W. W. L. Choi, A. M. Evens, M. Pilichowska, M. Sengar, N. Reddy, S. Li, A. Chadburn, L. I. Gordon, E. S. Jaffe, S. Levy, R. Rempel, T. Tzeng, L. E. Happ, T. Dave, D. Rajagopalan, J. Datta, D. B. Dunson, S. S. Dave, Genetic and functional drivers of diffuse large B cell lymphoma. *Cell* **171**, 481–494.e15 (2017).
14. P. M. Dominguez, H. Ghamlouch, W. Rosikiewicz, P. Kumar, W. Béguelin, L. Fontán, M. A. Rivas, P. Pawlikowska, M. Armand, E. Mouly, M. Torres-Martin, A. S. Doane, M. T. Calvo Fernandez, M. Durant, V. Della-Valle, M. Teater, L. Cimmino, N. Droin, S. Tadros, S. Motanagh, A. H. Shih, M.

- A. Rubin, W. Tam, I. Aifantis, R. L. Levine, O. Elemento, G. Inghirami, M. R. Green, M. E. Figueroa, O. A. Bernard, S. Aoufouchi, S. Li, R. Shaknovich, A. M. Melnick, TET2 deficiency causes germinal center hyperplasia, impairs plasma cell differentiation, and promotes B-cell lymphomagenesis. *Cancer Discov.* **8**, 1632–1653 (2018).
15. C. Quivoron, L. Couronné, V. Della Valle, C. K. Lopez, I. Plo, O. Wagner-Ballon, M. Do Cruzeiro, F. Delhommeau, B. Arnulf, M.-H. Stern, L. Godley, P. Opolon, H. Tilly, E. Solary, Y. Duffourd, P. Dessen, H. Merle-Beral, F. Nguyen-Khac, M. Fontenay, W. Vainchenker, C. Bastard, T. Mercher, O. A. Bernard, TET2 inactivation results in pleiotropic hematopoietic abnormalities in mouse and is a recurrent event during human lymphomagenesis. *Cancer Cell* **20**, 25–38 (2011).
16. F. Delhommeau, S. Dupont, V. D. Valle, C. James, S. Trannoy, A. Massé, O. Kosmider, J.-P. Le Couedic, F. Robert, A. Alberdi, Y. Lécluse, I. Plo, F. J. Dreyfus, C. Marzac, N. Casadevall, C. Lacombe, S. P. Romana, P. Dessen, J. Soulier, F. Viguié, M. Fontenay, W. Vainchenker, O. A. Bernard, Mutation in TET2 in myeloid cancers. *N. Engl. J. Med.* **360**, 2289–2301 (2009).
17. F. Lemonnier, L. Couronné, M. Parrens, J.-P. Jaïs, M. Travert, L. Lamant, O. Tournillac, T. Rousset, B. Fabiani, R. A. Cairns, T. Mak, C. Bastard, O. A. Bernard, L. de Leval, P. Gaulard, Recurrent TET2 mutations in peripheral T-cell lymphomas correlate with TFH-like features and adverse clinical parameters. *Blood* **120**, 1466–1469 (2012).
18. M. M. Patnaik, M. F. Zahid, T. L. Lasho, C. Finke, R. L. Ketterling, N. Gangat, K. D. Robertson, C. A. Hanson, A. Tefferi, Number and type of TET2 mutations in chronic myelomonocytic leukemia and their clinical relevance. *Blood Cancer J.* **6**, e472 (2016).
19. C.-W. J. Lio, V. Shukla, D. Samaniego-Castruita, E. González-Avalos, A. Chakraborty, X. Yue, D. G. Schatz, F. Ay, A. Rao, TET enzymes augment activation-induced deaminase (AID) expression via 5-hydroxymethylcytosine modifications at the *Aicda* superenhancer. *Sci. Immunol.* **4**, eaau7523 (2019).
20. E. Mouly, H. Ghamlouch, V. Della-Valle, L. Scourzic, C. Quivoron, D. Roos-Weil, P. Pawlikowska, V. Saada, M. K. Diop, C. K. Lopez, M. Fontenay, P. Dessen, I. P. Touw, T. Mercher, S. Aoufouchi, O. A. Bernard, B-cell tumor development in *Tet2*-deficient mice. *Blood Adv.* **2**, 703–714 (2018).

21. P. M. Dominguez, M. Teater, N. Chambwe, M. Kormaksson, D. Redmond, J. Ishii, B. Vuong, J. Chaudhuri, A. Melnick, A. Vasanthakumar, L. A. Godley, F. N. Papavasiliou, O. Elemento, R. Shaknovich, DNA methylation dynamics of germinal center B cells are mediated by AID. *Cell Rep.* **12**, 2086–2098 (2015).
22. R. Shaknovich, L. Cerchiatti, L. Tsikitas, M. Kormaksson, S. de, M. E. Figueroa, G. Ballon, S. N. Yang, N. Weinhold, M. Reimers, T. Clozel, K. Luttrup, T. J. Ekstrom, J. Frank, A. Vasanthakumar, L. A. Godley, F. Michor, O. Elemento, A. Melnick, DNA methyltransferase 1 and DNA methylation patterning contribute to germinal center B-cell differentiation. *Blood* **118**, 3559–3569 (2011).
23. L. Wang, P. A. Ozark, E. R. Smith, Z. Zhao, S. A. Marshall, E. J. Rendleman, A. Piunti, C. Ryan, A. L. Whelan, K. A. Helmin, M. A. Morgan, L. Zou, B. D. Singer, A. Shilatifard, TET2 coactivates gene expression through demethylation of enhancers. *Sci. Adv.* **4**, eaau6986 (2018).
24. A. Lex, N. Gehlenborg, H. Strobel, R. Vuillemot, H. Pfister, UpSet: Visualization of intersecting sets. *IEEE Trans. Vis. Comput. Graph.* **20**, 1983–1992 (2014).
25. Y. Jiang, A. Ortega-Molina, H. Geng, H.-Y. Ying, K. Hatzi, S. Parsa, D. McNally, L. Wang, A. S. Doane, X. Agirre, M. Teater, C. Meydan, Z. Li, D. Poloway, S. Wang, D. Ennishi, D. W. Scott, K. R. Stengel, J. E. Kranz, E. Holson, S. Sharma, J. W. Young, C.-S. Chu, R. G. Roeder, R. Shaknovich, S. W. Hiebert, R. D. Gascoyne, W. Tam, O. Elemento, H.-G. Wendel, A. M. Melnick, *CREBBP* inactivation promotes the development of HDAC3-dependent lymphomas. *Cancer Discov.* **7**, 38–53 (2017).
26. W. Béguelin, R. Popovic, M. Teater, Y. Jiang, K. L. Bunting, M. Rosen, H. Shen, S. N. Yang, L. Wang, T. Ezponda, E. Martinez-Garcia, H. Zhang, Y. Zheng, S. K. Verma, M. T. McCabe, H. M. Ott, G. S. Van Aller, R. G. Kruger, Y. Liu, C. F. McHugh, D. W. Scott, Y. R. Chung, N. Kelleher, R. Shaknovich, C. L. Creasy, R. D. Gascoyne, K.-K. Wong, L. Cerchiatti, R. L. Levine, O. Abdel-Wahab, J. D. Licht, O. Elemento, A. M. Melnick, EZH2 is required for germinal center formation and somatic EZH2 mutations promote lymphoid transformation. *Cancer Cell* **23**, 677–692 (2013).
27. S. Li, K. M. Paulsson, S. Chen, H. O. Sjögren, P. Wang, Tapasin is required for efficient peptide binding to transporter associated with antigen processing. *J. Biol. Chem.* **275**, 1581–1586 (2000).



28. B. Park, K. Ahn, An essential function of tapasin in quality control of HLA-G molecules. *J. Biol. Chem.* **278**, 14337–14345 (2003).
29. C.-W. J. Lio, V. Shukla, D. Samaniego-Castruita, E. González-Avalos, A. Chakraborty, X. Yue, D. G. Schatz, F. Ay, A. Rao, TET enzymes augment AID expression via 5hmC modifications at the Aicda superenhancer. *bioRxiv*, 438531 (2018).
30. H. W. Mittrücker, T. Matsuyama, A. Grossman, T. M. Kündig, J. Potter, A. Shahinian, A. Wakeham, B. Patterson, P. S. Ohashi, T. W. Mak, Requirement for the transcription factor LSIRF/IRF4 for mature B and T lymphocyte function. *Science* **275**, 540–543 (1997).
31. R. Kennedy, U. Klein, Aberrant activation of NF- $\kappa$ B signalling in aggressive lymphoid malignancies. *Cell* **7**, 189 (2018).
32. C.-W. Lio, J. Zhang, E. González-Avalos, P. G. Hogan, X. Chang, A. Rao, Tet2 and Tet3 cooperate with B-lineage transcription factors to regulate DNA modification and chromatin accessibility. *eLife* **5**, e18290 (2016).
33. Y. Yin, E. Morgunova, A. Jolma, E. Kaasinen, B. Sahu, S. Khund-Sayeed, P. K. Das, T. Kivioja, K. Dave, F. Zhong, K. R. Nitta, M. Taipale, A. Popov, P. A. Ginno, S. Domcke, J. Yan, D. Schübeler, C. Vinson, J. Taipale, Impact of cytosine methylation on DNA binding specificities of human transcription factors. *Science* **356**, eaaj2239 (2017).
34. Q. X. Xuan Lin, S. Sian, O. An, D. Thieffry, S. Jha, T. Benoukraf, MethMotif: An integrative cell specific database of transcription factor binding motifs coupled with DNA methylation profiles. *Nucleic Acids Res.* **47**, D145-D154 (2019).
35. G. Wang, X. Luo, J. Wang, J. Wan, S. Xia, H. Zhu, J. Qian, Y. Wang, MeDReaders: A database for transcription factors that bind to methylated DNA. *Nucleic Acids Res.* **46**, D146-D151 (2018).
36. Y. Jiang, T. D. Soong, L. Wang, A. M. Melnick, O. Elemento, Genome-wide detection of genes targeted by non-Ig somatic hypermutation in lymphoma. *PLOS ONE* **7**, e40332 (2012).

37. S. Cortellino, J. Xu, M. Sannai, R. Moore, E. Caretti, A. Cigliano, M. le Coz, K. Devarajan, A. Wessels, D. Soprano, L. K. Abramowitz, M. S. Bartolomei, F. Rambow, M. R. Bassi, T. Bruno, M. Fanciulli, C. Renner, A. J. Klein-Szanto, Y. Matsumoto, D. Kobi, I. Davidson, C. Alberti, L. Larue, A. Bellacosa, Thymine DNA glycosylase is essential for active DNA demethylation by linked deamination-base excision repair. *Cell* **146**, 67–79 (2011).
38. J. U. Guo, Y. Su, C. Zhong, G.-L. Ming, H. Song, Hydroxylation of 5-methylcytosine by TET1 promotes active DNA demethylation in the adult brain. *Cell* **145**, 423–434 (2011).
39. S. Kumar, V. Chinnusamy, T. Mohapatra, Epigenetics of modified DNA bases: 5-methylcytosine and beyond. *Front. Genet.* **9**, 640 (2018).
40. T. Pfaffeneder, F. Spada, M. Wagner, C. Brandmayr, S. K. Laube, D. Eisen, M. Truss, J. Steinbacher, B. Hackner, O. Kotljarova, D. Schuermann, S. Michalakis, O. Kosmatchev, S. Schiesser, B. Steigenberger, N. Raddaoui, G. Kashiwazaki, U. Müller, C. G. Spruijt, M. Vermeulen, H. Leonhardt, P. Schär, M. Müller, T. Carell, Tet oxidizes thymine to 5-hydroxymethyluracil in mouse embryonic stem cell DNA. *Nat. Chem. Biol.* **10**, 574–581 (2014).
41. M. Muramatsu, V. S. Sankaranand, S. Anant, M. Sugai, K. Kinoshita, N. O. Davidson, T. Honjo, Specific expression of activation-induced cytidine deaminase (AID), a novel member of the RNA-editing deaminase family in germinal center B cells. *J. Biol. Chem.* **274**, 18470–18476 (1999).
42. B. Reina-San-Martin, S. Difilippantonio, L. Hanitsch, R. F. Masilamani, A. Nussenzweig, M. C. Nussenzweig, H2AX is required for recombination between immunoglobulin switch regions but not for intra-switch region recombination or somatic hypermutation. *J. Exp. Med.* **197**, 1767–1778 (2003).
43. S. Zheng, B. Q. Vuong, B. Vaidyanathan, J.-Y. Lin, F.-T. Huang, J. Chaudhuri, Non-coding RNA Generated following Lariat debranching mediates targeting of AID to DNA. *Cell* **161**, 762–773 (2015).

44. P. Pham, R. Bransteitter, J. Petruska, M. F. Goodman, Processive AID-catalysed cytosine deamination on single-stranded DNA simulates somatic hypermutation. *Nature* **424**, 103–107 (2003).
45. K. D. Rasmussen, K. Helin, Role of TET enzymes in DNA methylation, development, and cancer. *Genes Dev.* **30**, 733–750 (2016).
46. D. Zotos, J. M. Coquet, Y. Zhang, A. Light, K. D'Costa, A. Kallies, L. M. Corcoran, D. I. Godfrey, K.-M. Toellner, M. J. Smyth, S. L. Nutt, D. M. Tarlinton, IL-21 regulates germinal center B cell differentiation and proliferation through a B cell-intrinsic mechanism. *J. Exp. Med.* **207**, 365–378 (2010).
47. A. Turqueti-Neves, M. Otte, O. P. da Costa, U. E. Höpken, M. Lipp, T. Buch, D. Voehringer, B-cell-intrinsic STAT6 signaling controls germinal center formation. *Eur. J. Immunol.* **44**, 2130–2138 (2014).
48. J. J. Jeong, X. Gu, J. Nie, S. Sundaravel, H. Liu, W.-L. Kuo, T. D. Bhagat, K. Pradhan, J. Cao, S. Nischal, K. L. McGraw, S. Bhattacharyya, M. R. Bishop, A. Artz, M. J. Thirman, A. Moliterno, P. Ji, R. L. Levine, L. A. Godley, U. Steidl, J. J. Bieker, A. F. List, Y. Sauntharajah, C. He, A. Verma, A. Wickrema, Cytokine-regulated phosphorylation and activation of TET2 by JAK2 in hematopoiesis. *Cancer Discov.* **9**, 778–795 (2019).
49. P. M. Dominguez, M. Teater, R. Shaknovich, The new frontier of epigenetic heterogeneity in B-cell neoplasms. *Curr. Opin. Hematol.* **24**, 402–408 (2017).
50. C. S. Nabel, H. Jia, Y. Ye, L. Shen, H. L. Goldschmidt, J. T. Stivers, Y. Zhang, R. M. Kohli, AID/APOBEC deaminases disfavor modified cytosines implicated in DNA demethylation. *Nat. Chem. Biol.* **8**, 751–758 (2012).
51. G. Rangam, K.-M. Schmitz, A. J. A. Cobb, S. K. Petersen-Mahrt, AID enzymatic activity is inversely proportional to the size of cytosine C5 orbital cloud. *PLOS ONE* **7**, e43279 (2012).
52. P. M. Dominguez, R. Shaknovich, Epigenetic function of activation-induced cytidine deaminase and its link to lymphomagenesis. *Front. Immunol.* **5**, 642 (2014).

53. C. Duy, M. Teater, F. E. Garrett-Bakelman, T. C. Lee, C. Meydan, J. L. Glass, M. Li, J. C. Hellmuth, H. P. Mohammad, K. N. Smitheman, A. H. Shih, O. Abdel-Wahab, M. S. Tallman, M. L. Guzman, D. Muench, H. L. Grimes, G. J. Roboz, R. G. Kruger, C. L. Creasy, E. M. Paietta, R. L. Levine, M. Carroll, A. M. Melnick, Rational targeting of cooperating layers of the epigenome yields enhanced therapeutic efficacy against AML. *Cancer Discov.* **9**, 872–889 (2019).
54. K. Moran-Crusio, L. Reavie, A. Shih, O. Abdel-Wahab, D. Ndiaye-Lobry, C. Lobry, M. E. Figueroa, A. Vasanthakumar, J. Patel, X. Zhao, F. Perna, S. Pandey, J. Madzo, C. Song, Q. Dai, C. He, S. Ibrahim, M. Beran, J. Zavadil, S. D. Nimer, A. Melnick, L. A. Godley, I. Aifantis, R. L. Levine, *Tet2* loss leads to increased hematopoietic stem cell self-renewal and myeloid transformation. *Cancer Cell* **20**, 11–24 (2011).
55. I. García-Ramírez, S. Tadros, I. González-Herrero, A. Martín-Lorenzo, G. Rodríguez-Hernández, D. Moore, L. Ruiz-Roca, O. Blanco, D. Alonso-López, J. D. L. Rivas, K. Hartert, R. Duval, D. Klinkebiel, M. Bast, J. Vose, M. Lunning, K. Fu, T. Greiner, F. Rodrigues-Lima, R. Jiménez, F. J. G. Criado, Ma. B. G. Cenador, P. Brindle, C. Vicente-Dueñas, A. Alizadeh, I. Sánchez-García, M. R. Green, *Crebbp* loss cooperates with *Bcl2* overexpression to promote lymphoma in mice. *Blood* **129**, 2645–2656 (2017).
56. G. Lenz, G. Wright, S. S. Dave, W. Xiao, J. Powell, H. Zhao, W. Xu, B. Tan, N. Goldschmidt, J. Iqbal, J. Vose, M. Bast, K. Fu, D. D. Weisenburger, T. C. Greiner, J. O. Armitage, A. Kyle, L. May, R. D. Gascoyne, J. M. Connors, G. Troen, H. Holte, S. Kvaloy, D. Dierickx, G. Verhoef, J. Delabie, E. B. Smeland, P. Jares, A. Martinez, A. Lopez-Guillermo, E. Montserrat, E. Campo, R. M. Braziel, T. P. Miller, L. M. Rimsza, J. R. Cook, B. Pohlman, J. Sweetenham, R. R. Tubbs, R. I. Fisher, E. Hartmann, A. Rosenwald, G. Ott, H.-K. Muller-Hermelink, D. Wrench, T. A. Lister, E. S. Jaffe, W. H. Wilson, W. C. Chan, L. M. Staudt, Lymphoma/Leukemia Molecular Profiling Project, Stromal gene signatures in large-B-cell lymphomas. *N. Engl. J. Med.* **359**, 2313–2323 (2008).
57. A. Akalin, F. E. Garrett-Bakelman, M. Kormaksson, J. Busuttil, L. Zhang, I. Khrebtukova, T. A. Milne, Y. Huang, D. Biswas, J. L. Hess, C. D. Allis, R. G. Roeder, P. J. M. Valk, B. Löwenberg, R. Delwel, H. F. Fernandez, E. Paietta, M. S. Tallman, G. P. Schroth, C. E. Mason, A. Melnick, M. E.

Figueroa, Base-pair resolution DNA methylation sequencing reveals profoundly divergent epigenetic landscapes in acute myeloid leukemia. *PLOS Genet.* **8**, e1002781 (2012).

58. A. Akalin, M. Kormaksson, S. Li, F. E. Garrett-Bakelman, M. E. Figueroa, A. Melnick, C. E. Mason, methylKit: A comprehensive R package for the analysis of genome-wide DNA methylation profiles. *Genome Biol.* **13**, R87 (2012).
59. S. Heinz, C. Benner, N. Spann, E. Bertolino, Y. C. Lin, P. Laslo, J. X. Cheng, C. Murre, H. Singh, C. K. Glass, Simple combinations of lineage-determining transcription factors prime *cis*-regulatory elements required for macrophage and B cell identities. *Mol. Cell* **38**, 576–589 (2010).
60. A. Dobin, C. A. Davis, F. Schlesinger, J. Drenkow, C. Zaleski, S. Jha, P. Batut, M. Chaisson, T. R. Gingeras, STAR: Ultrafast universal RNA-seq aligner. *Bioinformatics* **29**, 15–21 (2013).
61. Y. Liao, G. K. Smyth, W. Shi, The Subread aligner: Fast, accurate and scalable read mapping by seed-and-vote. *Nucleic Acids Res.* **41**, e108 (2013).
62. N. Ignatiadis, B. Klaus, J. B. Zaugg, W. Huber, Data-driven hypothesis weighting increases detection power in genome-scale multiple testing. *Nat. Methods* **13**, 577–580 (2016).
63. M. I. Love, W. Huber, S. Anders, Moderated estimation of fold change and dispersion for RNA-seq data with DESeq2. *Genome Biol.* **15**, 550 (2014).
64. R. Bourgon, R. Gentleman, W. Huber, Independent filtering increases detection power for high-throughput experiments. *Proc. Natl. Acad. Sci. U.S.A.* **107**, 9546–9551 (2010).
65. M. E. Ritchie, B. Phipson, D. Wu, Y. Hu, C. W. Law, W. Shi, G. K. Smyth, *limma* powers differential expression analyses for RNA-sequencing and microarray studies. *Nucleic Acids Res.* **43**, e47 (2015).
66. M. Martin, Cutadapt removes adapter sequences from high-throughput sequencing reads. *EMBnet.journal* **17**, 10–12 (2011).

67. B. Langmead, S. L. Salzberg, Fast gapped-read alignment with bowtie 2. *Nat. Methods* **9**, 357–359 (2012).
68. Y. Zhang, T. Liu, C. A. Meyer, J. Eeckhoute, D. S. Johnson, B. E. Bernstein, C. Nussbaum, R. M. Myers, M. Brown, W. Li, X. S. Liu, Model-based analysis of ChIP-Seq (MACS). *Genome Biol.* **9**, R137 (2008).
69. V. K. Mootha, C. M. Lindgren, K.-F. Eriksson, A. Subramanian, S. Sihag, J. Lehar, P. Puigserver, E. Carlsson, M. Ridderstråle, E. Laurila, N. Houstis, M. J. Daly, N. Patterson, J. P. Mesirov, T. R. Golub, P. Tamayo, B. Spiegelman, E. S. Lander, J. N. Hirschhorn, D. Altshuler, L. C. Groop, PGC-1 $\alpha$ -responsive genes involved in oxidative phosphorylation are coordinately downregulated in human diabetes. *Nat. Genet.* **34**, 267–273 (2003).
70. A. Subramanian, P. Tamayo, V. K. Mootha, S. Mukherjee, B. L. Ebert, M. A. Gillette, A. Paulovich, S. L. Pomeroy, T. R. Golub, E. S. Lander, J. P. Mesirov, Gene set enrichment analysis: A knowledge-based approach for interpreting genome-wide expression profiles. *Proc. Natl. Acad. Sci. U.S.A.* **102**, 15545–15550 (2005).
71. S. A. Armstrong, J. E. Staunton, L. B. Silverman, R. Pieters, M. L. den Boer, M. D. Minden, S. E. Sallan, E. S. Lander, T. R. Golub, S. J. Korsmeyer, MLL translocations specify a distinct gene expression profile that distinguishes a unique leukemia. *Nat. Genet.* **30**, 41–47 (2002).
72. A. Ortega-Molina, I. W. Boss, A. Canela, H. Pan, Y. Jiang, C. Zhao, M. Jiang, D. Hu, X. Agirre, I. Niesvizky, J.-E. Lee, H.-T. Chen, D. Ennishi, D. W. Scott, A. Mottok, C. Hother, S. Liu, X.-J. Cao, W. Tam, R. Shaknovich, B. A. Garcia, R. D. Gascoyne, K. Ge, A. Shilatifard, O. Elemento, A. Nussenzweig, A. M. Melnick, H.-G. Wendel, The histone lysine methyltransferase KMT2D sustains a gene expression program that represses B cell lymphoma development. *Nat. Med.* **21**, 1199–1208 (2015).
73. K. Hatzi, Y. Jiang, C. Huang, F. Garrett-Bakelman, M. D. Gearhart, E. G. Giannopoulou, P. Zumbo, K. Kirouac, S. Bhaskara, J. M. Polo, M. Kormaksson, A. D. MacKerell Jr., F. Xue, C. E. Mason, S. W. Hiebert, G. G. Prive, L. Cerchietti, V. J. Bardwell, O. Elemento, A. Melnick, A hybrid

mechanism of action for BCL6 in B cells defined by formation of functionally distinct complexes at enhancers and promoters. *Cell Rep.* **4**, 578–588 (2013).

74. S. Shaker, M. Bernstein, R. L. Momparler, Antineoplastic action of 5-aza-2'-deoxycytidine (Dacogen) and depsipeptide on Raji lymphoma cells. *Oncol. Rep.* **11**, 1253–1256 (2004).
75. L. Lai, J. Hennessey, V. Bares, E. W. Son, Y. Ban, W. Wang, J. Qi, G. Jiang, A. Liberzon, S. X. Ge, GSKB: A gene set database for pathway analysis in mouse. *bioRxiv.org*, 082511 (2016).
76. S. Aibar, C. B. González-Blas, T. Moerman, V. A. Huynh-Thu, H. Imrichova, G. Hulselmans, F. Rambow, J.-C. Marine, P. Geurts, J. Aerts, J. van den Oord, Z. K. Atak, J. Wouters, S. Aerts, SCENIC: Single-cell regulatory network inference and clustering. *Nat. Methods* **14**, 1083–1086 (2017).
77. C. J. Bult, J. A. Blake, C. L. Smith, J. A. Kadin, J. E. Richardson, Mouse Genome Database Group, *Nucleic Acids Res.* **47**, D801-D806 (2019).
78. H. Li, Aligning sequence reads, clone sequences and assembly contigs with BWA-MEM. arXiv:1303.3997, (2013).
79. A. Wilm, P. P. K. Aw, D. Bertrand, G. H. T. Yeo, S. H. Ong, C. H. Wong, C. C. Khor, R. Petric, M. L. Hibberd, N. Nagarajan, LoFreq: A sequence-quality aware, ultra-sensitive variant caller for uncovering cell-population heterogeneity from high-throughput sequencing datasets. *Nucleic Acids Res.* **40**, 11189–11201 (2012).
80. H. Li, A statistical framework for SNP calling, mutation discovery, association mapping and population genetical parameter estimation from sequencing data. *Bioinformatics* **27**, 2987–2993 (2011).
81. N. T. Gupta, J. A. Vander Heiden, M. Uduman, D. Gadala-Maria, G. Yaari, S. H. Kleinstein, Change-O: A toolkit for analyzing large-scale B cell immunoglobulin repertoire sequencing data. *Bioinformatics* **31**, 3356–3358 (2015).

82. J. A. Vander Heiden, G. Yaari, M. Uduman, J. N. H. Stern, K. C. O'Connor, D. A. Hafler, F. Vigneault, S. H. Kleinstein, pRESTO: A toolkit for processing high-throughput sequencing raw reads of lymphocyte receptor repertoires. *Bioinformatics* **30**, 1930–1932 (2014).
